# Supplementary material for: Human molecular evolutionary rate, time dependency and transient polymorphism effects viewed through ancient and modern mitochondrial DNA genomes
Source: Sci Rep. 2021 Mar 3;11:5036. doi: 10.1038/s41598-021-84583-1 (PMC7930196; doi:10.1038/s41598-021-84583-1)
Supplement: Supplementary file 1 — Supplementary Information [file 41598_2021_84583_MOESM1_ESM.xlsx]

## Sheet: Stable1
Supplementary table 1: ancientDNA samples
						Mutations from the root
Sample	Region	mtHaplogroup	Age cal BP	Reference	Mt seq accs.	M	N
Ust_Ishim	Russia	R*	47,480-42,560	Fu et al. 2014			2
BachoKiroCC7-335	Bulgaria	N*	46,790-44,830	Hublin et al. 2020	MN706605		4
BachoKiroBB7-240	Bulgaria	N*	46,130-44,400	Hublin et al. 2020	MN706603		4
BachoKiroCC7-2289	Bulgaria	R*	44,980-43,340	Hublin et al. 2020	MN706606		2
BachoKiroAA7-738	Bulgaria	M*	44,210-42,810	Hublin et al. 2020	MN706602	2
Oase 1	Romania	N*	41,760-37,310	Fu et al. 2015			0
Tianyuan	China	B4'5	40,765-38,185	Fu et al. 2013a	KC417443		7
Fumane 2	Italy	R*	40,254-37761	Benazzi et al. 2015	KP718913		5
Kostenki 14	Russia	U2*	38,680-36,260	Seguin-Orlando et al. 2014	FN600416		11
BuranKaya 3A	Crimea	preN1b	37,660-33,850	Bennett et al. 2019			8
GoyetQ116-1	Belgium	M*	35,160-34,430	Posth et al. 2016	KU534952	6
BachoKiroF6-620	Bulgaria	M*	35,970-35,140	Hublin et al. 2020	MN706607	2
Salkhit	Mongolia	N*	34,950-33,900	Deviese et al. 2019			9
BachoKiro-BK1653	Bulgaria	U8*	34,820-34,210	Hublin et al. 2020			10
GoyetQ376-3	Belgium	M*	33,940-33,140	Posth et al. 2016	KU534953	8
Cioclovina 1	Romania	U*	33,905-32,519	Posth et al. 2016	KU534969		6
Pestera M1	Romania	U6*	33,760-32,840	Hervella et al. 2016			9
Paglicci 133	Italy	U8c	33,110-31,210	Posth et al. 2016	KU534956		11
DolniVestonice 13	Czechia	U8c	31,070-30,670	Fu et al. 2013b	KC521459		12
DolniVestonice 14	Czechia	U5*	31,070-30,670	Fu et al. 2013b	KC521458		7
DolniVestonice43	Czechia	U5*	30,710-29,310	Posth et al. 2016	KU534970		8
Paglicci 108	Italy	U2'3'4'7'8'9	28,430-27,070	Posth et al. 2016	KU534968		10
GoyetQ53-1	Belgium	U2*	28,230-27,720	Posth et al. 2016	KU534966		12
Goyet2878-21	Belgium	U5*	28,077-25,889	Posth et al. 2016	KU534955		10
LaRochette	France	M*	27,784-27,400	Posth et al. 2016	KU534951	7
GoyetQ55-2	Belgium	U2*	27,730-27,310	Posth et al. 2016	KU534948		17
GoyetQ376-19	Belgium	U2*	27,720-27,310	Posth et al. 2016	KU534967		15
GoyetQ56-16	Belgium	U2*	26,600-26,040	Posth et al. 2016	KU534965		12
Mal'ta 1	Siberia	U*	24,423-23,891	Raghavan et al.2014			14
Paglicci 71	Italy	U5b2b	19,250-18,210	Posth et al. 2016	KU534950		18
Yak025	Siberia	R1	16,865-16,590	Kilinc et al. 2018	MH359229		12
Oriente C	Sicily	U2'3'4'7'8'9	16,776-14,220	Mathieson et al. 2018			15
HohleFels 49	Germany	U8a	16,000-14,260	Posth et al. 2016	KU534964		14
Rigney 1	France	U2*	15,690-15,240	Posth et al. 2016	KU534957		15
PinarbasiZBC	Turkey	K2b	15,642-15,073	Feldman et al. 2019			19
GoyetQ2	Belgium	U8a	15,230-14,780	Posth et al. 2016	KU534963		12
Brillenhohle	Germany	U8a	15,120-14,440	Posth et al. 2016	KU534947		13
Burkhardtshohle	Germany	U8a	15,080-14,150	Posth et al. 2016	KU534960		14
HohleFels 79	Germany	U8a	15,070-14,270	Posth et al. 2016	KU534962		14
TAF011	Morocco	U6a7a	15,077-14,132	van de Loosdrecht et al. 2018	MG936621		16
TAF014	Morocco	M1b	14,930-14,030	van de Loosdrecht et al. 2018	MG936624	16
TAF012	Morocco	U6a7a	14,890-14,049	van de Loosdrecht et al. 2018	MG936622		16
TAF013	Morocco	U6a7b	14,890-14,049	van de Loosdrecht et al. 2018	MG936623		18
TAF015	Morocco	U6a1b	14,890-14,049	van de Loosdrecht et al. 2018	MG936625		13
TAF009	Morocco	U6a6b	14,805-13,908	van de Loosdrecht et al. 2018	MG936619		16
Villabruna	Italy	U5*	14,180-13,780	Fu et al. 2016			13
Paglicci RimP	Italy	U2’3’4’7’8’9	15,000-11,000	Fu et al. 2013B			17
Oberkassel 998	Germany	U5b1	14,501-13,758	Fu et al. 2013b	KC521457		14
Natufian 9	Israel	N1b	13,840-11,760	Lazaridis et al. 2016			19
Bichon	Switzerland	U5b1h	13,770-13,560	Jones et al. 2015			15
Satsurblia	Georgia	K3	13,380-13,132	Jones et al. 2015			30
BAL001/5	Iberia	U5b2a	13,380-12,660	Villalba-Mouco et al. 2019			22
Rochedane	France	U5b2b	13,090-12,830	Posth et al. 2016	KU543971		19
HohleFels 10	Germany	U8a	13,085-12,770	Posth et al. 2016	KU534961		14
Anzick-1	Montana	D4h3a	13,039-12,763	Rasmussen et al. 2014		19
Iboussieres 39	France	U5b2b	12,040-11,600	Posth et al. 2016	KU534972		21
Iboussieres 31-2	France	U5b1	12,040-11,410	Posth et al. 2016	KU534976		16
USR1	Alaska	C1b	11,600-11,270	Tackney et al. 2015	KT891989	15
USR2	Alaska	B2b	11,600-11,270	Tackney et al. 2015	KT891990		13
Continenza 7	Italy	U5b2b1	11,200-10,510	Fu et al. 2013a			20
Longlin	China	M71d	11000	Bai et al. 2020		8
QSYDD	China	M71d	11000	Bai et al. 2020		9
Bla 20	Germany	U5a2c3	10,710-10,594	Bollongino et al. 2013	KF523407		15
ZHJ	Turkey	U3*	10,300-9,800	Feldman et al. 2019			15
ZMOJ	Turkey	K1a	10,300-9,800	Feldman et al. 2019			20
ZHAG	Turkey	N1a1a1	10,300-9,800	Feldman et al. 2019			22
LesCloseaux 3	France	U5a2	10,240-9,560	Posth et al. 2016	KU534958		13
Rancho 88	France	U5b1	10,240-9,930	Posth et al. 2016	KU534978		17
Ibourssieres 25-1	France	U5b2a	10,090-9,460	Posth et al. 2016	KU534981		17
Kotias	Georgia	H13c	9,895-9,529	Jones et al. 2015			10
KFH2	Israel	N1a1b	9,712-9,589	Feldman et al. 2019			18
MereuilLesMeaux 1	France	U5a2	9,500-9,080	Posth et al. 2016	KU534959		13
Falkenstein	Germany	U5b2a	9,410-8,990	Posth et al. 2016	KU534980		18
Theo 1	Greece	K1c	9,288-8,771	Hofmanova et al. 2016	KU171095		23
Theo 5	Greece	K1c	9,288-8,771	Hofmanova et al. 2016	KU171094		20
irk007	Siberia	F1b1f	9,035-8,690	Kilinc et al. 2018	MH359195		18
Baja001	Jordan	N1b1a	9,027-8685	Feldman et al. 2019			19
Felsdach	Austria	U5a2c	8,980-8,380	Posth et al. 2016	KU534954		16
HohlensteinStadel	Germany	U5b2c1	8,980-8440	Posth et al. 2016	KU534979		20
irk00x	Siberia	C*	8,500-8,435	Kilinc et al. 2018	MH359197	16
Catalhoyuk_20374	Turkey	X2b4	8,450-8,380	Chylenski et al. 2019	MK308702		15
Rev 5	Greece	X2b	8,438-8,264	Hofmanova et al. 2016	KU171096		20
Ofnet	Germany	U5b1d1	8,430-8,060	Posth et al. 2016	KU534974		17
Bar 31	Turkey	X2m	8,419-8238	Hofmanova et al. 2016	KU171097		12
Bockstein	Germany	U5b1d1	8,370-8,160	Posth et al. 2016	KU534973		17
Motala 1	Sweden	U5a1	8,361-7,516	Lazaridis et al. 2014			15
Motala 2	Sweden	U2e1	8,361-7,516	Lazaridis et al. 2014			23
Motala 3	Sweden	U5a1	8,361-7,516	Lazaridis et al. 2014			16
Motala 4	Sweden	U5a2d	8,361-7,516	Lazaridis et al. 2014			15
Motala 6	Sweden	U5a2d	8,361-7,516	Lazaridis et al. 2014			15
Motala 9	Sweden	U5a2	8,361-7,516	Lazaridis et al. 2014			19
Motala 12	Sweden	U2e1	8,361-7,516	Lazaridis et al. 2014			23
CuiryLesChaudardes 1	France	U5b1b	8,360-8,050	Posth et al. 2016	KU534975		20
Liangdao_man	Taiwan	E	8,320-8,060	Ko et al. 2014	KF540505	9
Iyai 1	Japan	N9b1	8,300-8,200	Mizumo et al. 2020	LC521960		12
Iyai 4	Japan	N9b3	8,300-8,200	Mizumo et al. 2020	LC521961		9
Iya1 8	Japan	N9b1	8,300-7,800	Mizumo et al. 2020	LC521962		14
Bar 8	Turkey	K1a2	8,212-8,030	Hofmanova et al. 2016	KU171098		24
BAL003	Iberia	U2’3’4’7’8’9	8,185-7,941	Villalba-Mouco et al. 2019			14
Loschbour	Luxembourg	U5b1a	8,160-7,940	Lazaridis et al. 2014	KC521455		17
Boshan 11	China	B4c1a	8,160-7,940	Fu et al. 2013b	KC521454		12
irk051	Siberia	F1b1f	8,020-7,975	Kilinc et al. 2018	MH359208		18
LaBraña 1	Iberia	U5b2c1	7,940-7,690	Sanchez-Quinto et al. 2012	JX186998		22
KO1	Hungary	R1b	7,780-7,650	Gamba et al. 2014			18
KO2	Hungary	K1	7,710-7,570	Gamba et al. 2014			20
mak001	Siberia	D4	7,660-7,610	Kilinc et al. 2018	MH359219	10
Brn008	Siberia	D4	7,615-7,485	Kilinc et al. 2018	MH359193	10
Donkalnis 1	Lithuania	U5b1	7,500-7,300	Mittnik et al. 2018	MG428999		17
Uz0077	Russia	R1b	7,500-7,000	Mittnik et al. 2018	MG428995		19
UznyiOleniOstrov-74	Russia	C1f	7500	Sarkissian et al. 2014		19
Brn001	Siberia	A*	7,490-7,465	Kilinc et al. 2018	MH359191		12
CB13	Iberia	K1a2a	7,470-7,320	Olalde et al. 2014			20
CB14	Iberia	X2c	7,470-7,320	Olalde et al. 2014			10
H3c6	Iberia	H4a1a	7,470-7,290	Olalde et al. 2014			13
G21	Iberia	H3	7,360-7,220	Olalde et al. 2014			8
F19	Iberia	H4a1a	7,330-7,200	Olalde et al. 2014			14
IAM.3	Morocco	M1b1	7,325-7,210	Fregel et al. 2018	MF99143	18
BerryAuBac 1	France	U5b1a	7,320-7,170	Posth et al. 2016	KU534977		14
Konnu2a	Estonia	U2e2a	7,310-7070	Mittnik et al. 2018	MG429013		16
LBK 380	Germany	T2c1d	7,310-7070	Lazaridis et al. 2014			28
NE1	Hungary	U5b2c	7,310-7,070	Gamba et al. 2014			18
NE6	Hungary	K1a3a3	7,300-6,950	Gamba et al. 2014			22
Sam1	Poland	N1a1a1a	7,300-7,000	Chylenski et al. 2017	KY091895		23
IAM.6	Morocco	U6a7b	7,290-7,265	Fregel et al. 2018	MF991433		19
NE2	Hungary	H*	7,290-7,060	Gamba et al. 2014			8
NE4	Hungary	J1c	7,290-7,050	Gamba et al. 2014			11
Tor.6	Iberia	Tb3+151	7,280-6,780	Fregel et al. 2018			24
CHA001	Iberia	HV0+195	7,257-7,006	Villalba-Mouco et al. 2019			9
CHA002	Iberia	K1a2a	7,250-7,018	Villalba-Mouco et al. 2019			20
CHA003	Iberia	K1a3a	7,245-6,947	Villalba-Mouco et al. 2019			20
IAM.4	Morocco	U6a1b	7,215-7005	Fregel et al. 2018	MF991431		19
NE3	Hungary	X2b	7,210-7,010	Gamba et al. 2014			11
NE5	Hungary	J1c1	7,210-6,990	Gamba et al. 2014			20
IAM.5	Morocco	U6a1b	7,199-7,176	Fregel et al. 2018	MF991432		19
FUC003	Iberia	X2b+226	7,157-6,910	Villalba-Mouco et al. 2019			14
TOR.11	Iberia	K1a2a	7,030-6,850	Fregel et al. 2018			20
IAM.7	Morocco	U6a3	7,000-6,840	Fregel et al. 2018	MF991434		16
KM1	Poland	U5b1b	6,800-6,500	Chylenski et al. 2017	KY091896		19
Brn003	Siberia	D4	6,790-6,685	Kilinc et al. 2018	MH359192	9
SX30	Switzerland	U8b1b1	6,786-6,618	Furtwaengler et al.2020	MT079105		16
KZ6	Poland	N1a1a1	6,500-6,000	Chylenski et al. 2017	KY091895		23
CHA004	Iberia	U4a2f	6,494-6,321	Villalba-Mouco et al. 2019			20
NE7	Hungary	N1a1a1a	6,490-6,360	Gamba et al. 2014			21
Arm52	Caucasus	U8b1a1	6,486-6,320	Margaryan et al. 2017	MF362732		20
Kretuonas 1	Lithuania	U5b1	6,460-5,820	Mittnik et al. 2018	MG429005		16
SX11MT	Switzerland	J1c1b	6,458-6,362	Furtwaengler et al.2020	MT079096		20
Pal 7	Greece	J1c1	6,452-6,350	Hofmanova et al. 2016	KU171099		22
Brn012	Siberia	D4b1a2	6,340-6,240	Kilinc et al. 2018	MH359194	16
N5a	Siberia	D3	6,340-6,235	Kilinc et al. 2018	MH359224	17
Brn002	Siberia	D2a’b	6,325-6,280	Kilinc et al. 2018	MH359190	15
irk040	Siberia	A+152+16362+16189	6,325-6,280	Kilinc et al. 2018	MH359206		13
R18-1	Poland	K2a	6,310-6,190	Chylenski et al. 2017	KY091897		22
Kleitos10	Greece	K1a2	6,230-5,995	Hofmanova et al. 2016	KU171100		20
Koljala1	Estonia	U4a	6,230-5810	Mittnik et al. 2018	MG429015		23
ELT006	Iberia	U3a1	5,895-5,716	Villalba-Mouco et al. 2019			17
ELT002	Iberia	J1c1b	5,882-5,658	Villalba-Mouco et al. 2019			20
NHP1	Poland	H5	5,800-5,600	Chylenski et al. 2017	KY091894		11
KEB.1	Morocco	Xm’n	5,780-5,650	Fregel et al. 2018	MF991435		15
KEB.7	Morocco	Tb3+151	5,780-5,650	Fregel et al. 2018	MF991439		24
irk067	Siberia	G2a	5,755-5,745	Kilinc et al. 2018	MH359211	18
Eiros 2	Iberia	U5b3	5,715-5,203	Gonzalez-Fortes et al. 2019	MK321342		17
V3.13.1	Ukraine	HV	5,700-5,500	Nikitin et al. 2017	KY198379		7
V3.14.1	Ukraine	T2b	5,700-5,500	Nikitin et al. 2017	KY198380		23
V3.17.1	Ukraine	H5a	5,700-5,501	Nikitin et al. 2017	KY198381		11
irk034	Siberia	D4j	5,640-5,620	Kilinc et al. 2018	MH359204	11
irk075	Siberia	D4j12	5,620-5,605	Kilinc et al. 2018	MH359215	10
Bla 11	Germany	U5b2b2	5,617-5,589	Bollongino et al. 2013	KF523406		12
Bla 7	Germany	H5	5,686-5,646	Bollongino et al. 2013	KF523402		10
Bla 14	Germany	U5b2b2	5,617-5,589	Bollongino et al. 2013	KF523406		19
Bla 13	Germany	H5	5,615-5,411	Bollongino et al. 2013	KF523405		9
M5	Ukraine	H1b	5,600-4,900	Nikitin et al. 2017	KY198382		11
Bla 10	Germany	H1c	5,481-5,355	Bollongino et al. 2013	KF523403		12
Atapuerca 3	Iberia	K1a2b	5,466-5,312	Günther et al. 2015			23
Rebolal	Iberia	K2b1a	5,450-4,699	Gonzalez-Fortes et al. 2019	MK321343		25
BM36	Bulgaria	N1a1a1	5,348-5,010	Modi et al. 2019	MH605039		21
irk017	Siberia	D4j5a	5,335-5,210	Kilinc et al. 2018	MH359198	12
irk071	Siberia	D4j	5,335-5210	Kilinc et al. 2018	MH359213	10
Iceman_4550	Italy	K1f	5,315-5,067	Ermini et al. 2008	EU810403		21
Ajv52	Sweden	V*	5,300-4,350	Skoglund et al. 2012			9
Ajv70	Sweden	U4d	5,300-4,350	Skoglund et al. 2012			20
Atapuerca7	Iberia	J1c1b1	5,295-4,894	Günther et al. 2015			21
MX150MT	Switzerland	H4a1a	5,244-5,102	Furtwaengler et al.2020	MT079040		15
Atapuerca 16	Iberia	X2c	5,211-4,866	Günther et al. 2015			14
MX204MT	Switzerland	K1a2b	5,100-4,928	Furtwaengler et al.2020	MT079046		21
Ire8	Sweden	U4d	5,100-4,150	Skoglund et al. 2012			20
irk072	Siberia	D4j	5,095-4,915	Kilinc et al. 2018	MH359214	12
Aes4	Switzerland	H3	5,094-4,926	Furtwaengler et al.2020	MT079020		9
Aes16	Switzerland	K1a2	5,090-4,918	Furtwaengler et al.2020	MT079031		25
LU339	Iberia	H3	5,025-4,753	Gonzalez-Fortes et al. 2019	MK321331		8
Gök 4	Sweden	H*	5,021-4,821	Skoglund et al. 2012			8
Ste 7	Sweden	T2b3+151	5,021-4,821	Skoglund et al. 2012			23
Aes13	Switzerland	X2b+226	5,016-4,901	Furtwaengler et al.2020	MT079028		15
arm2	Caucasus	R1a1	5,000-4,800	Margaryan et al. 2017	M362711		22
Atapuerca 12-1420	Iberia	H3c	4,960-4,829	Günther et al. 2015			11
Atapuerca 17	Iberia	H3	4,957-4,821	Günther et al. 2015			13
irk033	Siberia	C4a1a3	4,920-4,880	Kilinc et al. 2018	MH359203	22
Aes7	Switzerland	U5b2b2	4,919-4,883	Furtwaengler et al.2020	MT079023		18
Aes20	Switzerland	K2b1a	4,913-4,878	Furtwaengler et al.2020	MT079038		23
CO1	Hungary	H*	4,900-4,700	Gamba et al. 2014			7
mak026	Siberia	C4	4,895-4,860	Kilinc et al. 2018	MH359220	18
Aes21	Switzerland	U8b1b	4,892-4694	Furtwaengler et al.2020	MT079035		20
irk030	Siberia	A10	4,885-4,835	Kilinc et al. 2018	MH359201		16
irk036	Siberia	F1b1b	4,885-4,835	Kilinc et al. 2018	MH359205		22
irk068	Siberia	F1b1b	4,885-4,835	Kilinc et al. 2018	MH359212		23
Atapuerca 2	Iberia	U5b3	4,849-4,628	Günther et al. 2015			16
N4a1	Siberia	A12a	4,830-4,820	Kilinc et al. 2018	MH359222		20
SX8MT	Switzerland	U3a1	4,695-4,481	Furtwaengler et al.2020	MT079093		18
LD270	Iberia	U8a	4,642-4,386	Gonzalez-Fortes et al. 2019	MK321333		14
BTK141	Canada	C1b	4,589-4,008	Duggan et al. 2017	MF588810	18
Saqqaq	Greenland	D2a1	4,585-4,423	Gilbert et al. 2008	EU725621	17
Kunila 1	Estonia	U5b1h	4,580-4,340	Mittnik et al. 2018	MG429025		19
irk057	Siberia	C4	4,550-4,535	Kilinc et al. 2018	MH359209	21
poz221	Ukraine	X4	4,548-4,348	Juras et al. 2018	MH176338		17
HUGO_1805k2	Germany	U5b2b	4,542-4,270	Knipper et al. 2017	MF498687		18
irk025	Siberia	A+152+16362+16189	4,475-4,335	Kilinc et al. 2018	MH359200		13
irk050	Siberia	R1b1	4,475-4,335	Kilinc et al. 2018	MH359207		18
irk061	Siberia	D4j1	4,475-4,335	Kilinc et al. 2018	MH359210	15
N4b2	Siberia	A12a	4,475-4,295	Kilinc et al. 2018	MH359223		19
Ampack 1	Germany	T2b33	4.470-4310	Knipper et al. 2017	MF498691		22
UNTA58-62-153	Germany	R1a1a	4,470-4,310	Knipper et al. 2017	MF498737		23
SX29MT	Switzerland	T2b	4,463-4,208	Furtwaengler et al.2020	MT079104		22
SX26MT	Switzerland	K2b1	4,461-4,295	Furtwaengler et al.2020	MT079103		22
MX259	Switzerland	K1a3a	4,456-4,203	Furtwaengler et al.2020	MT079027		21
irk022	Siberia	D3	4,455-4,200	Kilinc et al. 2018	MH359199	17
BTK178	Canada	X2a1	4,391-3,961	Duggan et al. 2017	MF588826		17
poz551	Poland	T2b	4,350-3,600	Juras et al. 2020	MN699894		22
Kra001	Siberia	C4b1	4,295-4,140	Kilinc et al. 2018	MH359218	19
irk076	Siberia	C4a2a1	4,275-4,250	Kilinc et al. 2018	MH359216	21
Atapuerca 20	Iberia	U5a1c	4,239-4,000	Günther et al. 2015			17
POST_84	Germany	X2b+226	4,197-4,034	Knipper et al. 2017	MF498715		14
POST_44	Germany	K1a3a	4,197-4,034	Knipper et al. 2017	MF498699		22
MX251MT	Switzerland	K1a1a	4,197-3,981	Furtwaengler et al.2020	MT079092		22
BM36	Bulgaria	N1a1a1a	4,197-4,166	Modi et al. 2019	MH605039		21
BR1	Hungary	K1c1	4,190-3,980	Gamba et al. 2014			22
OBKR_80	Germany	K1a	4,150-3,650	Knipper et al. 2017	MF498712		22
OBKR_66	Germany	U4a	4,136-3,780	Knipper et al. 2017	MF498705		18
OBKR_73	Germany	U5b2	4,136-3,780	Knipper et al. 2017	MF498709		18
OBKR_81	Germany	X2b	4,136-3,780	Knipper et al. 2017	MF498713		15
OBKR_9A	Germany	K1a2a	4,136-3,780	Knipper et al. 2017	MF498724		21
LD903	Iberia	U3a1	4,083-3,747	Gonzalez-Fortes et al. 2019	MK321335		19
WEHR_11925	Germany	U5b2a	4,029-3,916	Knipper et al. 2017	MF498727		21
Yak022	Siberia	C4b1	3,940-3,765	Kilinc et al. 2018	MH359226	18
irk008	Siberia	C4a1a3	3,930-3,750	Kilinc et al. 2018	MH359196	23
SX23MT	Switzerland	X2b4	3,883-3,749	Furtwaengler et al.2020	MT079102		15
MX279MT	Switzerland	U5b1+16189	3,882-3,745	Furtwaengler et al.2020	MT079082		19
Funadomari 23	Japan	N9b1	3,800-3,500	Kanzawa-Kiriyama et al. 2019			11
arm43	Caucasus	U4a	3,800/3,600	Margaryan et al. 2017			16
arm45	Caucasus	T*	3,800-3,600	Margaryan et al. 2017	MF362726		17
Atapuerca 9	Iberia	U5b1b	3,700-3,568	Günther et al. 2015			22
arm23	Caucasus	R1a1a	3,500-3,300	Margaryan et al. 2017	MF362705		22
arm30	Caucasus	U8b1a2b	3,500-3,300	Margaryan et al. 2017	MF362712		22
arm29	Canada	R1b1	3,400-3,200	Margaryan et al. 2017	MF362710		15
Yak021	Siberia	C4b	3,385-3,340	Kilinc et al. 2018	MH359225	16
Yak023	Siberia	C4b1	3,880-3,690	Kilinc et al. 2018	MH359227	18
Yak024	Siberia	C4b1	3,880-3,690	Kilinc et al. 2018	MH359228	18
CAN.008	Canaries	U6a7a1	3,300-3,100	Fregel et al. 2019	MK193612		21
BR2	Hungary	K1a1a	3,270-3,110	Gamba et al. 2014			24
irk078	Siberia	C*	3,260-3,050	Kilinc et al. 2018	MH359217	17
Sanganji B	Japan	N9b1	3,099-3,023	Kanzawa-Kiriyama et al. 2017			12
Sanganji A	Japan	N9b1	3,032-2,956	Kanzawa-Kiriyama et al. 2017			13
arm27	Caucasus	HV	3,039-2,935	Margaryan et al. 2017	MF362708		10
arm3	Caucasus	K3	3,039-2,864	Margaryan et al. 2017	MF362721		29
arm1	Caucasus	K3	3,000-2,800	Margaryan et al. 2017	MF362701		27
IR1	Hungary	G2a1	2,980-2,830	Gamba et al. 2014		15
N3a	Siberia	C4b3	2,790-2,730	Kilinc et al. 2018	MH359221	18
MX265MT	Switzerland	U5a1	2.763-2,431	Furtwaengler et al.2020	MT079089		15
Ikawazu 002	Japan	N9b1	2,720-2,418	McColl et al. 2018			13
GXBS1	China	G3a1	2,730-2,460	Zhang et al. 2020	MN006853	13
SCY006	Ukraine	D4j2	2,700-2,400	Juras et al. 2017	KX977305	11
SCY332	Moldova	M10a1a1a	2,400-2,200	Juras et al. 2017	KX977319	23
SCY198	Ukraine	U5a1c	2,400-2,200	Juras et al. 2017	KX977313		21
MS10622	Ibiza	H3	2,300-2,200	Zalloua et al. 2018	MH043583		14
BTK75	Canada	D2a1	1,558/1,173	Duggan et al. 2017	MF588857	19
TL_347	Thailand	G2b1a	1,450-1,240	Zhang et al. 2020	MN006864	11
WXWS_1	China	C7a	1,370-1,110	Zhang et al. 2020	MN006868	14
CG14E01_9	Urugay	C1b	645-565	Figueiro et al. 2017	KT449866	21
Can038	Canaries	U6a1a1	663-559	Fregel et al. 2019	MK139613		19
Paglicci 23	Italy	T2b	690-612				28
BTK63	Canada	X2a1b	549-150	Duggan et al. 2017	MF588851		20
Kellis 2	Egypt	U1a1a	129-385 AD	Molto et al. 2017	MF498884		24
LRV_148	Italy	X2+225	100-400 AD	Emery et al. 2018	MG773646		12
LRV_93	Italy	X2e2a	100-400 AD	Emery et al. 2018	MG773647		18
LRV_97	Italy	N1a1a1	100-400 AD	Emery et al. 2018	MG773635		24
LIAV_31	Italy	U5a1	100-400 AD	Emery et al. 2018	MG773617		20
WLH4	Australia	S2a1	100-126 AD	Heupink et al. 2016	KU659023		15
PA86	Australia	P12b	100-126 AD	Wright et al. 2018	MK165669		29
YN785	Thailand	F1a1a1	2500-800 BP	Zhang et al. 2020	MN006874		24
YN805	Thailand	F1a1a1	2500-800 BP	Zhang et al. 2020	MN006875		24
Lev 1	Finland	T1a1	300-800 AD	Oversti et al. 2019	MN540463		25
Lev2	Finland	U5b1b1a1	300-800 AD	Oversti et al. 2019	MN540464		19
Lev 3	Finland	U5a2a1	300-800 AD	Oversti et al. 2019	MN540465		18
Lev 4	Finland	H1c	300-800 AD	Oversti et al. 2019	MN540466		10
Lev 5	Finland	U5b1b1a1a	300-800 AD	Oversti et al. 2019	MN540467		20
Lev 6	Finland	U5b1b1a	300-800 AD	Oversti et al. 2019	MN540468		20
Lev 7	Finland	U5a1a1	300-800 AD	Oversti et al. 2019	MN540469		16
Lev 8	Finland	U5b1b1a1b	300-800 AD	Oversti et al. 2019	MN540470		20
Lev 9	Finland	U5a1a1	300-800 AD	Oversti et al. 2019	MN540471		16
Lev 10	Finland	K1a4a1b	300-800 AD	Oversti et al. 2019	MN540472		28
Lev 11	Finland	U5b2a5	300-800 AD	Oversti et al. 2019	MN540473		20
Lev 12	Finland	H1+16189	300-800 AD	Oversti et al. 2019	MN540474		11
TL882	Thailand	F1a1a1	300-990 AD	Zhang et al. 2020	MN006866		25
YN337	Thailand	F1a1a1	300-990 AD	Zhang et al. 2020	MN006870		25
YN338	Thailand	F1a1a1	300-990 AD	Zhang et al. 2020	MN006871		28
FLI2	Australia	P5a	335-504 AD	Wright et al. 2018	MK165666		20
KP1	Australia	S2a1a	400-500 AD	Wright et al. 2018	MK165667		13
Byrsa	Tunisia	U5b2c1	600 AD	Matisoo-Smith et al. 2016	KT760574		25
LHSZ3	Hungary	H+16291	600 AD	Vai et al. 2018	MG182490		12
LHSZ27A1	Hungary	X2+225	600 AD	Vai et al. 2018	MG182476		14
LHSZ35	Hungary	U5b3b	600 AD	Vai et al. 2018	MG182485		18
LHSZ41	Hungary	U4a	600 AD	Vai et al. 2018	MG182492		16
LHHEG12	Hungary	U8a1a2	600 AD	Vai et al. 2018	MG182454		20
bla001	Siberia	D4e4a	620-670 AD	Kilinc et al. 2018	MH359189	11
LICOL36	Italy	X2b+226	600-700 AD	Vai et al. 2018	MG182509		16
LICOL38	Italy	X2	600-700 AD	Vai et al. 2018	MG182510		11
LICOL63	Italy	H+152	600-700 AD	Vai et al. 2018	MG182515		9
LICOL_121	Italy	T2b	600-700 AD	Vai et al. 2018	MG182502		26
CroMagnon 1	France	T2b32	690 AD	Fu et al. 2013a	KC521456		28
Luistari 1	Finland	U4b1b1a	600-1200 AD	Oversti et al. 2019	MN540475		22
Luistari 2	Finland	H1c9	600-1200 AD	Oversti et al. 2019	MN540476		12
Luistari 3	Finland	W1e1	600-1200 AD	Oversti et al. 2019	MN540477		21
Luistari 4	Finland	H1+16189	600-1200 AD	Oversti et al. 2019	MN540478		9
Luistari 5	Finland	U2e2a1a	600-1200 AD	Oversti et al. 2019	MN540479		27
Luistari 7	Finland	U5b2a1a	600-1200 AD	Oversti et al. 2019	MN540481		21
Luistari 8	Finland	U4d1	1169-1274 AD	Oversti et al. 2019	MN540482		20
Luistari 9	Finland	H3h5	600-1200 AD	Oversti et al. 2019	MN540483		11
Luistari 10	Finland	H1b	600-1200 AD	Oversti et al. 2019	MN540484		11
Hollola 1	Finland	U5a2a1e	1050-1300 AD	Oversti et al. 2019	MN540485		18
Hollola 2	Finland	U5b1b1g1	1050-1300 AD	Oversti et al. 2019	MN540486		26
Hollola 3	Finland	H2a1c	1050-1300 AD	Oversti et al. 2019	MN540487		10
Hollola 4	Finland	U5b2a1a1d	1050-1300 AD	Oversti et al. 2019	MN540488		23
Hollola 5	Finland	U5b1b2	1050-1300 AD	Oversti et al. 2019	MN540489		17
Hollola 6	Finland	U4d1a1a	1050-1300 AD	Oversti et al. 2019	MN540490		22
Hollola 7	Finland	H85	1050-1300 AD	Oversti et al. 2019	MN540491		10
Hollola 8	Finland	U4b1b1	1050-1300 AD	Oversti et al. 2019	MN540492		23
Hollola 9	Finland	U5a1b1h	1050-1300 AD	Oversti et al. 2019	MN540493		18
Hollola 10	Finland	U4a2	1050-1300 AD	Oversti et al. 2019	MN540494		19
Hollola 11	Finland	U5a2a1e	1050-1300 AD	Oversti et al. 2019	MN540495		18
Hollola 12	Finland	H1f1	1050-1300 AD	Oversti et al. 2019	MN540496		13
Hollola 13	Finland	H85	1050-1300 AD	Oversti et al. 2019	MN540497		10
Hollola 14	Finland	U4b1b1b	1050-1300 AD	Oversti et al. 2019	MN540498		29
Hollola 15	Finland	V7a	1050-1300 AD	Oversti et al. 2019	MN540499		17
Hollola 16	Finland	H1c13	1050-1300 AD	Oversti et al. 2019	MN540500		10
Hiitola 1	Finland	H1a8a	1200-1500 AD	Oversti et al. 2019	MN540501		12
Hiitola 2	Finland	H1c9	1200-1500 AD	Oversti et al. 2019	MN540502		12
Hiitola 3	Finland	H1a2	1200-1500 AD	Oversti et al. 2019	MN540503		10
Hiitola 5	Finland	W6	1200-1500 AD	Oversti et al. 2019	MN540505		22
Hiitola 6	Finland	K1a2c	1200-1500 AD	Oversti et al. 2019	MN540506		28
Hiitola 7	Finland	W6	1200-1500 AD	Oversti et al. 2019	MN540507		21
Hiitola 8	Finland	H1b2	1200-1500 AD	Oversti et al. 2019	MN540508		12
Hiitola 9	Finland	U1b2	1200-1500 AD	Oversti et al. 2019	MN540509		9
Hiitola 10	Finland	W6	1200-1500 AD	Oversti et al. 2019	MN540510		22
Hiitola 11	Finland	H1a7	1200-1500 AD	Oversti et al. 2019	MN540511		10
Hiitola 12	Finland	H10g	1200-1500 AD	Oversti et al. 2019	MN540512		11
Hiitola 13	Finland	U1b2	1200-1500 AD	Oversti et al. 2019	MN540513		23
Hiitola 14	Finland	H1ap1	1200-1500 AD	Oversti et al. 2019	MN540514		16
CAP-C58-5	Romania	U6a1a1	1000 AD	Rusu et al. 2019	MH298072		18
Tuukkala 1	Finland	D5a3a1a	1200-1400 AD	Oversti et al. 2019	MN540529	20
Tuukkala 2	Finland	U5a2a2a	1200-1400 AD	Oversti et al. 2019	MN540530		18
Tuukkala 3	Finland	J1c7a	1200-1400 AD	Oversti et al. 2019	MN540531		22
Tuukkala 4	Finland	H10e	1200-1400 AD	Oversti et al. 2019	MN540515		11
Tuukkala 5	Finland	H1a8a	1200-1400 AD	Oversti et al. 2019	MN540532		12
Tuukkala 6	Finland	H11a1	1200-1400 AD	Oversti et al. 2019	MN540516		15
Tuukkala 7	Finland	V7a1	1200-1400 AD	Oversti et al. 2019	MN540517		14
Tuukkala 8	Finland	H1f1	1200-1400 AD	Oversti et al. 2019	MN540518		13
Tuukkala 9	Finland	H10e	1200-1400 AD	Oversti et al. 2019	MN540519		11
Tuukkala 10	Finland	H1a7	1200-1400 AD	Oversti et al. 2019	MN540520		11
Tuukkala 11	Finland	H24a	1200-1400 AD	Oversti et al. 2019	MN540521		10
Tuukkala 12	Finland	H10g	1200-1400 AD	Oversti et al. 2019	MN540522		10
Tuukkala 13	Finland	H27a	1200-1400 AD	Oversti et al. 2019	MN540523		11
Tuukkala 14	Finland	J1c2c1	1200-1400 AD	Oversti et al. 2019	MN540524		23
Tuukkala 15	Finland	U5b1b1a	1200-1400 AD	Oversti et al. 2019	MN540525		18
Tuukkala 16	Finland	U5a2a1a	1200-1400 AD	Oversti et al. 2019	MN540526		19
Tuukkala 17	Finland	X2c1	1200-1400 AD	Oversti et al. 2019	MN540527		12
Tuukkala 18	Finland	U8b1a2b	1225-1525 AD	Oversti et al. 2019	MN540528		24
Pälkäne 1	Finland	T2b	1200-1700 AD	Oversti et al. 2019	MN540533		22
Pälkäne 2	Finland	U5b2b1a1	1200-1700 AD	Oversti et al. 2019	MN540534		24
Pälkäne 3	Finland	H2a1	1200-1700 AD	Oversti et al. 2019	MN540535		12
Pälkäne 4	Finland	H1+16189	1200-1700 AD	Oversti et al. 2019	MN540536		11
irk032	Siberia	D6c	1280-1320 AD	Kilinc et al. 2018	MH359202	15
Porvoo 1	Finland	U8a1a1b1	1300-1700 AD	Oversti et al. 2019	MN540537		22
Porvoo 2	Finland	T2b23	1300-1700 AD	Oversti et al. 2019	MN540538		33
Porvoo 3	Finland	T2b23	1300-1700 AD	Oversti et al. 2019	MN540539		33
Porvoo 4	Finland	J1c2	1300-1700 AD	Oversti et al. 2019	MN540540		19
Porvoo 5	Finland	H1a3c	1300-1700 AD	Oversti et al. 2019	MN540541		11
Porvoo 6	Finland	H13a1a1d	1300-1700 AD	Oversti et al. 2019	MN540542		18
Porvoo 7	Finland	T1b1	1300-1700 AD	Oversti et al. 2019	MN540543		20
Le06	England	K2b1a	1400 AD	Klunk et al. 2019	MK059619		22
Le119	England	K1a3a	1400 AD	Klunk et al. 2019	MK059630		25
Lg03	England	X2b+226	1400 AD	Klunk et al. 2019	MK059655		15
Lg36	England	HV	1400 AD	Klunk et al. 2019	MK059674		10
LM43	England	U5b2b	1400 AD	Klunk et al. 2019	MK059705		20
LM55	England	U5b1+16192	1400 AD	Klunk et al. 2019	MK059714		20
LM92	England	H3	1400 AD	Klunk et al. 2019	MK059739		10
LD97	Denmark	T2b33	1400 AD	Klunk et al. 2019	MK059615		26
LD111	Denmark	U8a1a	1400 AD	Klunk et al. 2019	MK059575		19
LP216	Denmark	X2c1d	1400 AD	Klunk et al. 2019	MK059532		15
LP222	Denmark	U3a1	1400 AD	Klunk et al. 2019	MK059535		20
LP208	Denmark	H3	1400 AD	Klunk et al. 2019	MK059526		10
LP240	Denmark	J1c1	1400 AD	Klunk et al. 2019	MK059545		20
LP249	Denmark	K1a2a	1400 AD	Klunk et al. 2019	MK059549		22
LP371	England	T2b	1400 AD	Klunk et al. 2019	MK059551		23
Turku 1	Finland	H*	1500-1650AD	Oversti et al. 2019	MN540552		14
Turku 2	Finland	H2a1	1500-1650AD	Oversti et al. 2019	MN540553		10
Turku 3	Finland	H*	1500-1650AD	Oversti et al. 2019	MN540554		14
Turku 4	Finland	J1c2c1	1500-1650AD	Oversti et al. 2019	MN540555		23
Turku 5	Finland	T2b	1500-1650AD	Oversti et al. 2019	MN540556		25
Renko 1	Finland	H10a	1500-1800 AD	Oversti et al. 2019	MN540544		11
Renko 2	Finland	H28a	1500-1800 AD	Oversti et al. 2019	MN540545		12
Renko 3	Finland	H49	1500-1800 AD	Oversti et al. 2019	MN540546		11
Renko 4	Finland	U5b2a1a2	1500-1800 AD	Oversti et al. 2019	MN540547		18
Renko 5	Finland	U4a2	1500-1800 AD	Oversti et al. 2019	MN540548		19
Renko 6	Finland	J1c2	1500-1800 AD	Oversti et al. 2019	MN540549		18
Renko 7	Finland	U4d1a1a	1500-1800 AD	Oversti et al. 2019	MN540550		22
Renko 8	Finland	H*	1500-1800 AD	Oversti et al. 2019	MN540551		9
Hamina 1	Finland	H1n4	1700-1800 AD	Oversti et al. 2019	MN540557		11
Hamina 2	Finland	H1a5	1700-1800 AD	Oversti et al. 2019	MN540558		12
Hamina 3	Finland	H12a	1700-1800 AD	Oversti et al. 2019	MN540559		11
Hamina 4	Finland	C4a1a1	1700-1800 AD	Oversti et al. 2019	MN540560	22
Hamina 5	Finland	U5a2a1b	1700-1800 AD	Oversti et al. 2019	MN540561		18
Hamina 6	Finland	T2b	1700-1800 AD	Oversti et al. 2019	MN540562		23
Hamina 7	Finland	H10g	1700-1800 AD	Oversti et al. 2019	MN540563		10
Hamina 8	Finland	H1as2	1700-1800 AD	Oversti et al. 2019	MN540564		10
Hamina 9	Finland	T2c1d1	1700-1800 AD	Oversti et al. 2019	MN540565		31
arm14	Caucasus	U1a1a	1700-1800 AD	Margaryan et al. 2017	MF362696		24
References
Bai et al. 2020. Paleolithic genetic link between southern China and mainland southeast Asia revealed by ancient mitochondrial genomes. J.Hum. Evol. 10038-20-0796-9.
Benazzi et al. 2015. The makers of the Protoaurignacian and implications for Neandertal extinction. Science 348(6236), 793-796.
Bennett et al. 2019. The origin of the Gravettians: genomic evidence from a 36,000-year-old eastern European. BioRxiv preprint.
Bollongino et al. 2013. 2000 years of parallel societies in Stone Age Central Europe. Science 342 (6157), 479-481.
Emery et al. 2018. Ancient Roma mitochondrial and isotopic evidence reveal relationships at the local and pan-Mediterranean scales. J.Archaeolog.Sci. 20, 200-209.
Ermini et al. 2008. Complete mitochondrial genome sequence of the Tyrolean iceman. Curr.Biol. 18(21), 1687-1693.
Chylenski et al. 2017. Late Danubian mitochondrial genomes shed light into the Neolithisation of Central Europe in the 5th millenium BC. BMC Evol.Biol. 17(1), 80.
Chylenski et al. 2019. Ancient mitochondrial genomes reveal the absence of maternal kinship in the burials of Catalhoyuk people and their genetic affinities. Genes 10(3), 207.
Deviese et al. 2019. Compound-specific radiocarbondating and mitochondrial DNA analysis of the Pleistocene hominin from Salkhit,Mongolia. Nat.Com. 10:274
Duggan et al. 2017. Genetic discontinuity between the maritime archaic and Beothuk populations in Newfoundland, Canada. Curr.Biol. 27(20), 3149-3156.
Feldman et al. 2019. Late Pleistocene human genome suggest a local origin for the first farmers of central Anatolia. Nat. Com. 10,1218.
Figueiro et al. 2017. Análisis del genoma mitocondrial de dos individuos inhumados en el sitio arqueológico CG14E01 "Isla Larga"(Rocha,Uruguay). Rev.Argentina de Antropología Biológica 19(1), 1-17.
Fregel et al. 2018. Ancient genomes from North Africa evidence prehistoric migrations to the Maghreb from both the Levant and Europe. Proc. Natl. Acad. Sci. USA 115(26), 6774-6779.
Fregel et al. 2019. Mitogenomes illuminate the origin and migration patterns of the indigenous people of the Canary Islands. PoS ONE 14(3), e09125.
Fu et al. 2013a. DNA analysis of an early modern human from Tianyuan cave, China. PNAS 110(6), 223-227.
Fu et al. 2013b. A revised timescale for human evolution based on ancient mitochondrial genomes. Curr.Bio. 23(7), 553-559.
Fu et al. 2014. Genome sequence of a 45,000-year-old modern human from western Siberia. Nature 514, 445-449.
Fu et al. 2015. An early modern human from Romania with a recent Neanderthal ancestor. Nature 524, 216-219.
Fu et al. 2016. The genetic history of Ice Age Europe. Nature, 534(7606), 200-205.
Furtwaengler et al. 2020. Ancient genomes reveal social and genetic structure of Late Neolithic Switzerland. Nat. Com. 1915.
Gamba et al. 2014. Genome flux and stasis in a five millennium transct of European prehistory. Nat. Comm. 5, 5257.
Gilbert et al. 2008. Paleo-Eskimo mtDNA genome reveals matrilineal discontinuity in Greenland. Science 320(5884), 1787-1789.
Gonzalez-Fortes et al. 2019. A western route of prehistoric human migration from Africa into the Iberian Peninsula. Proc.Biol.Sci. 286(1895), 20182288.
Hervella et al. 2016. The mitogenome of a 35,000 year-old Homo sapiens from Europe supports a Palaeolithic back-migration to Africa. Sci.Rep. 6,25501.
Heupink et al. 2016. Ancient mtDNA sequences from the first Australians revisited. Proc.Natl.Acad.Sci.USA 113(25), 6892-6897.
Hofmanova et al. 2016. Early farmers from across Europe directly descended from Neolithic Aegeans. PNAS 113(25), 6886-6891.
Hublin et al. 2020. Initial Upper Palaeolithic Homo sapiens from Bacho Kiro cave, Bulgaria. Nature581, 299.
Jones et al. 2015. Upper Palaeolithic genomes reveal deep roots of modern Eurasians. Nat.Comm. 6, 8912.
Juras et al. 2017. Diverse origin of mitochondrial lineages in Iron Age Black Sea Scythians. Sci. Rep. 7, 43950.
Juras et al. 2018. Mitochondrial genomes reveal an east to west cline of steppe ancestry in Corded Ware populations. Sci.Rep. 8(1), 11603.
Juras et al. 2020. Mitochondrial genomes from Bronze Age Poland reveal genetic continuity from the Late Neolithic and additional genetic affinities with the steppe populations. Am.J.Phys.Anthropol. 172(32), 176-188.
Kanzawa-Kiriyama et al. 2019. Late Jomon male and female genome sequences from the Funadomari site in Hokkaido, Japan. Anthropological Science 127(2), 83-108.
Kanzawa-Kiriyama et al. 2017. A partial nuclear genome of the Jomons who lived 3000 years ago in Fukusima, Japan. J.Hum.Genet. 62, 213-221.
Kilinc et al. 2018. Investigating Holocene human population history in North Asia using ancient mitogenomes. Sci. Rep. 8, 8969
Klunk et al. 2019. Genetic resiliency and the Black Death: No apparent loss of mitogenomic diversity due to the Black Death in medieval London and Denmark. Am.J.Phys.Anthropol. 169(2),240-252.
Knipper et al. 2017. Female exogamy and gene pool diversification at the transition from the final Neolithic to the early Bronze age in Central Europe. Proc.Natl.Acad.Sci.USA 114(38), 10083-10088.
Ko et al. 2014. Early Austronesians: into and out of Taiwan. Am. J. Hum. Genet. 94(3), 426-436.
Lazaridis et al. 2014. Ancient human genomes suggest three ancestral populations for present-day Europeans. Nature 513, 409-413.
Lazaridis et al. 2016. Genomic insights into the origin of farming in the ancient Near East. Nature 536, 419-424.
Margaryan et al. 2017. Eight millennia of matrilineal genetic continuity in the south Caucasus. Curr. Biol. 27(13), 2023-2028.
Mathieson et al. 2018. The genomic history of southeastern Europe. Nature 555(7695), 197-203.
Matisoo-Smith et al. 2016. A European mitocchondrial haplotype identified in ancient Phoenician remains from Carthage North Africa. PLoS ONE 11(5), e0155046.
McColl et al. 2018. The prehistoric peopling of southeast Asia. Science 361, 88-92.
Mittnik et al. 2018. The genetic prehistory of the Baltic sea region. Nat. Com. 9, 442.
Mizumo et al. 2020. A study of 8,300 year old Jomon human remains in Japan using complete mitogenome sequences obtained by next-generation sequencing. Ann.Hum.Biol. 19, 1-5.
Modi et al. 2019. Ancient human mitochondrial genomes from Bronze Age Bulgaria: new insights into the genetic history of Thracians. Sci.Rep. 9(1), 5412.
Molto et al. 2017. Complete mitochondrial genome sequencing of a burial from a Roman-Byzantgine cementery in the Dakhleh oasis, Egypt: preliminary indications. Genes 8(10), 262.
Oversti et al. 2019. Human mitochondrial DNA lineages in Iron-Age Fennoscandia suggest incipient admixture and eastern introduction of farming-related maternal ancestry. Sci.Rep. 9(1), 16883
Posth et al. 2016. Pleistocene mitochondrial genomes suggest a single major dispersal of non-Africans and a Late Glacial population turnover in Europe. Curr.Biol. 26(6):827-833.
Raghavan et al. 2014. Upper Palaeolithic Siberian genome reveals dual ancestry of Native Americans. Nature 505, 87-91.
Rusu et al. 2019. Mitochondrial ancestry of medieval individuals carelessly interred in a multiple burial from southeastern Romania. Sci.Rep. 9(1), 961.
Sanchez-Quinto et al. 2012. Genomic affinities of two 7,000 year-old Iberian hunter-gatherers. Curr.Biol. 22, 1494-1499.
Sarkissian et al. 2014. Mitochondrial genome sequencing in Mesolithic Northeast Europe unearths a new sub-clade within the broadly distributed human haplogroup C1. PLoS ONE 9(2), e87612.
Seguin-Orlando et al. 2014. Genomic structure in Europeans dating back at least 36,200 years. Science 346(6213), 1113-1118.
Skoglund et al. 2012. Origins and genetic legacy of Neolithic farmers and hunter-gatherers in Europe. Science 336, 466.
Tackney et al. 2015. Two contemporaneous mitogenomes from terminal Pleistocene burials in eastern Beringia. PNAS 112(45), 13833-13838.
Vai et al. 2018. A genetic perspective on Longobard-Era migrations. Eur. J. Hum. Genet. 27, 647-656.
van de Loosdrecht et al. 2018. Pleistocene North African genomes link Near Eastern and sub-Saharan African human populations. Science 360(6388), 548-552.
Villalba-Mouco et al. 2019. Survival of Late Pleistocene hunter-gatherer ancestry in the Iberian Peninsula. Curr. Biol. 29(7), 1169-1177.
Wright et al. 2018. Ancient nuclear genomes enable repatriation of indigenous human remains. Sci.Adv. 4(12), eaau5064
Zalloua et al. 2018. Ancient DNA of Phoenician remains indicates discontinuity in the settlement history of Ibiza. Sci.Rep. 8, 17567.
Zhang et al. 2020. A matrilineal genetic perspective of hanging coffin custom in southern China and northern Thailand. iScience, 101032.

## Sheet: Stable2
Supplementary Table 2: Present-day mtDNA samples
				Mutations to the root of
Accession	Region	mtHg	Reference	M	N
AF381996	Jordan	M1b1	Maca-Meyer et al. 2001	18
AF381999	Jordan	N1b1a	Maca-Meyer et al. 2001		21
AP008474	Japan	N9b3	Tanaka et al. 2004		11
AP008496	Japan	D4j	Tanaka et al. 2004	11
AP008837	Japan	N9b	Tanaka et al. 2004		19
AP009475	Japan	N9b	Kazuno et al. 2008		10
AP010722	Japan	N9b1	Bilal et al. 2008		10
AP013225	Japan	A+152+16362+16189	Mikami et al. 2013		14
AY255178	China	M10a1a1a	Kong et al. 2004	24
AY275533	Morocco	U6a7b1	Maca-Meyer et al. 2003		25
AY339571	Finland	T1b1	Finnila et al. 2001		22
AY519487	Siberia	C4b	Starikovskaya et al. 2005	18
AY19488	Siberia	A12a	Starikovskaya et al. 2005		19
DQ156210	Iberia	U5b2a	Montiel-Sosa et al. 2006		17
DQ156212	Iberia	U5a	Montiel-Sosa et al. 2006		15
DQ523622	Sardinia	H3	Fraumene et al. 2006		8
DQ523631	Italy	X2c	Fraumene et al. 2006		14
EF093538	Taiwan	E1a	Soares et al. 2008	14
EF114289	China	F1a1a1	Wang et al. 2007		26
EU007859	Siberia	J1	Ingman and Gyllensten 2007		17
EU007861	Siberia	C4a2a1	Ingman and Gyllensten 2007	22
EU007879	Siberia	C4b1	Ingman and Gyllensten 2007	20
EU095531	Ecuador	D4h3a	Tamm et al. 2007	21
EU428195	Finland	D5a3a1a	FTDNA	19
EU482305	Siberia	D4b1a2	Volodko et al. 2008	20
EU482316	Siberia	D3	Volodko et al. 2008	18
EU482324	Siberia	D2a	Volodko et al. 2008	15
EU482334	Siberia	D2a	Volodko et al. 2008	15
EU760854	England	K1a2b	FTDNA		23
FJ147311	Siberia	U2e1	Sukernik et al. 2012		29
FJ168755	California	D4h3a	Perego et al. 2009	20
FJ168760	USA	X2a1b	Perego et al. 2009		20
FJ194437	France	U5b1a	FTDNA		15
FJ415605	Lithuania	D4j2	FTDNA	13
FJ441666	France	X2b	FTDNA		17
FJ457949	France	X2b	FTDNA		14
AF381996	Siberia	C4a1a3	Derenko et al. 2010	23
FJ951458	Siberia	D4j5a	Derenko et al. 2010	13
FJ951469	Siberia	D4j	Derenko et al. 2010	13
FJ951476	Siberia	C4b1	Derenko et al. 2010	19
FJ951553	Siberia	D4j12	Derenko et al. 2010	11
FJ951569	Siberia	D4e4a	Derenko et al. 2010	13
FJ951604	Russia	C4*	Derenko et al. 2010	17
GQ337580	India	U2	Palanichamy et al. 2015		24
GQ129147	Iberia	U5b3	Pala et al.2009		19
GQ129168	Italy	U5b3b	Pala et al.2009		22
GQ129169	Germany	U5b3b	Pala et al.2009		18
GQ895156	Tibet	C-16093	Qin et al. 2010	18
GU014566	China	G3a1	Zhao et al. 2019	13
GU123007	Russia	U1b2	Malyarchuk et al. 2010		25
GU296565	Czechia	U5b1h	Malyarchuk et al. 2010		21
GU296602	Russia	U5a2a1	Malyarchuk et al. 2010		19
GU797476	Ireland	U4b1b1a	FTDNA		24
HM021760	France	K1a3a	FTDNA		25
HM116534	Finland	U5b1b1a1a	FTDNA		21
HM030512	China	B4'5	Kong et al. 2012		21
HM041971	France	K1a2b	FTDNA		29
HM046248	Iberia	U5b1b	Gil-Bolardo et al. 2010		26
HM103362	Iberia	K2b	Gomez-Duran et al. 2010		24
HM625696	Austria	K1a	KLoss-Brandstaetter et al. 2010		24
HM852886	Georgia	K3	Schoenberg et al. 2011		32
HM856585	Finland	J1c2	FTDNA		18
HM996895	Armenia	R1b1	FTDNA		21
HQ286324	Armenia	N1b1a	FTDNA		22
HQ384187	Iberia	H4a1a	Gomez-Carballa et al. 2011		16
HQ384188	Iberia	H4a1a	Gomez-Carballa et al. 2011		16
HQ384203	Iberia	Tb3+151	Gomez-Carballa et al. 2011		26
HQ384214	Iberia	X2b	Gomez-Carballa et al. 2011		12
HQ404665	Iberia	U3a1	FTDNA		17
HQ651696	Iberia	U6a1b2	Pereira et al. 2010		19
HQ651711	Palestine	U6a3	Pereira et al. 2010		20
HQ658133	Sweden	H1c	FTDNA		11
HQ839861	Ireland	K1a3a3	Behar et al. 2012		26
JN375993	Siberia	D4	Sukernik et al. 2012	12
JN411082	Finland	U5b2a1a2	FTDNA		19
JN584175	Europe	U5b2b	FTDNA		24
JN969087	England	U5b2a1a1d	FTDNA		21
JQ044923	BurkinaFaso	U6a’b’d	Barbieri et al. 2012		15
JQ245754	Kabardia	N1a1a1	Fernandes et al. 2012		23
JQ324592	Iberia	H4a1a	Behar et al. 2012		16
JQ324618	Iberia	H3c	Behar et al. 2012		10
JQ701887	Belarus	U2e1	Behar et al. 2012		29
JQ701922	England	U5a2c3	Behar et al. 2012		20
JQ702018	Finland	J1c2c1	Behar et al. 2012		23
JQ702372	Ireland	K1a3a	Behar et al. 2012		26
JQ702468	England	U5b2c1	Behar et al. 2012		23
JQ702759	Europe	U8a	Behar et al. 2012		16
JQ702761	Switzerland	U8a1a2	Behar et al. 2012		20
JQ702816	Algeria	U6a1b2	Behar et al. 2012		16
JQ702914	USA	C1b	Behar et al. 2012	20
JQ703184	England	K2b1a	Behar et al. 2012		24
JQ703282	Poland	H1as2	Behar et al. 2012		11
JQ703407	Europe	K1a4a1b	Behar et al. 2012		26
JQ703453	Finland	H11a1	Behar et al. 2012		18
JQ703458	Belgium	T2b23	Behar et al. 2012		25
JQ703728	Europe	T2b32	Behar et al. 2012		28
JQ703854	Finland	H2a1	Behar et al. 2012		11
JQ704054	Germany	U5b2c1	Behar et al. 2012		24
JQ704141	Germany	H1a5	Behar et al. 2012		11
JQ704811	Iberia	U4a2f	Behar et al. 2012		24
JQ704971	Scotland	U5b3b	Behar et al. 2012		18
JQ705295	Sweden	R1a1a	Behar et al. 2012		24
JQ705346	Finland	U8a1a1b1	Behar et al. 2012		23
JQ705609	Finland	U4a2	Behar et al. 2012		20
JQ705620	Germany	K1a2a	Behar et al. 2012		22
JQ797788	Austria	J1c1b	Pala et al.2012		24
JX021501	England	X2b+226	FTDNA		14
JX120724	Morocco	U6a6b1	Secher et al. 2013		21
JX152931	Denmark	H85	Raule et al. 2014		11
JX152978	Finland	W6	Raule et al. 2014		21
JX152980	Finland	H24a	Raule et al. 2014		10
JX153030	Italy	N1a1a1	Raule et al. 2014		27
JX153040	Italy	U6a1b1	Raule et al. 2014		21
JX153047	Greece	U8b1a2b	Raule et al. 2014		26
JX153104	Italy	U5a2d	Raule et al. 2014		20
JX153181	Finland	H2a1	Raule et al. 2014		12
JX153183	Finland	W1e1	Raule et al. 2014		21
JX153196	Finland	U5a1b1h	Raule et al. 2014		19
JX153203	Finland	H1a8a	Raule et al. 2014		15
JX153208	Finland	H1f1	Raule et al. 2014		13
JX153223	Finland	H3h5	Raule et al. 2014		11
JX153225	Finland	U5a2a2a	Raule et al. 2014		18
JX153233	Finland	U4d1a1a	Raule et al. 2014		22
JX153265	Finland	U5b1b1a1b	Raule et al. 2014		22
JX153334	Denmark	T2b33	Raule et al. 2014		24
JX153623	Finland	X2c1	Raule et al. 2014		13
JX153823	Finland	U1b2	Raule et al. 2014		23
JX153832	Finland	U2e2a1a	Raule et al. 2014		30
JX153848	Finland	H1n4	Raule et al. 2014		12
JX154064	Finland	V7a1	Raule et al. 2014		14
JX171100	Finland	H1f1	Soini et a2014		13
JX171113	Finland	U5a2a1e	Soini et a2014		22
JX266268	Poland	C4a1a1	Mielnik-Sikorska et al. 2013	23
KC152542	Morocco	M1b1	Pennarun et al. 2012	22
KC152555	Tunisia	U6a7b	Pennarun et al. 2012		25
KC286592	Austria	K1a2	Kloss-Brandstaetter et al. 2015		25
KC763411	Finland	U5a	Soini et a2014		15
KC853448	Finland	J1c7a	FTDNA		25
KC985152	India	R1b1	Fedorova et al. 2013		24
KF148088	Siberia	F1b1b	Duggan et al.2013		23
KF148222	Siberia	F1b1f	Duggan et al.2013		19
KF148225	Siberia	A12a	Duggan et al.2013		18
KF148517	Siberia	N9b	Duggan et al.2013		9
KF161097	Denmark	H1ap1	Li et al. 2014		15
KF161099	Denmark	K1a3a	Li et al. 2014		25
KF161136	Denmark	U2e2a	Li et al. 2014		29
KF161426	Denmark	H1c13	Li et al. 2014		11
KF161463	Denmark	U5b2a	Li et al. 2014		23
KF161535	Denmark	T2b23	Li et al. 2014		32
KF161641	Denmark	K1a2a	Li et al. 2014		21
KF161698	Denmark	W6	Li et al. 2014		23
KF161865	Denmark	H1a3c	Li et al. 2014		13
KF162305	Denmark	U4d1	Li et al. 2014		28
KF162639	Denmark	T2c1d1	Li et al. 2014		27
KF162715	Denmark	J1c1	Li et al. 2014		20
KF162741	Denmark	K1a1a	Li et al. 2014		22
KF162764	Denmark	U5b2b	Li et al. 2014		26
KF16277	Denmark	U5b2a5	Li et al. 2014		22
KF162774	Denmark	V7a	Li et al. 2014		17
KF162798	Denmark	Tb3+151	Li et al. 2014		27
KF162812	Denmark	X2c1d	Li et al. 2014		14
KF162844	Denmark	X2b+226	Li et al. 2014		20
KF451614	Italy	HV0a	Lippold et al. 2014		12
KF451788	China	D6c	Lippold et al. 2014	17
KF644446	France	K2b1a	FTDNA		24
KF451072	France	X2b+226	Lippold et al. 2014		16
KF451673	China	G2a	Lippold et al. 2014	20
KF451752	China	F1b1b	Lippold et al. 2014		25
KF451776	China	C7a	Lippold et al. 2014	17
KF584057	Croatia	X2+225	Sarac et al. 2013		18
KF849921	China	G2b1a	Jiang et al. 2014	17
KF874366	Siberia	D2a1a	Dryomov et al. 2015	16
KJ445922	England	U5b2b2	Zheng et al. 2011		18
KJ856809	Czechia	U3a1	Derenko et al. 2014		19
KJ923836	Canada	X2a1	Rieux et al. 2014		18
KM096769	Serbia	H5	Davidovic et al. 2015		10
KM102010	Iberia	K2b1a	Just et al. 2014		23
KM216990	Germany	U8a1a2	FTDNA		22
KM576763	Sweden	H10e	FTDNA		12
KP172341	Argentina	C1b	Sevini et al. 2016	21
KP688570	Sweden	U5b1b1g1	FTDNA		29
KP688571	Finland	U4a2	FTDNA		19
KP702821	Bulgaria	R1b1	FTDNA		24
KR105198	Scotland	U4b1b1	FTDNA		22
KR858868	France	X2b4	FTDNA		17
KR902534	Greece	X2e2a	FTDNA		16
KT372902	England	U5b1+16192	FTDNA		23
KT587616	Cambodia	R1*	KLoss-Brandstaetter et al. 2018		21
KT749777	Italy	K1a2a	Coia et al. 2016		24
KT749783	Italy	K2b1	Coia et al. 2016		27
KT763051	Russia	T2b	FTDNA		22
KT779159	Lebanon	U2’3’4’7’8’9	Matisoo-Smith et al. 2016		23
KT779177	Lebanon	U2’3’4’7’8’9	Matisoo-Smith et al. 2016		21
KT819214	Iberia	U6a1a1a	Hernandez et al. 2015		20
KT819265	Iberia	U6a7a1	Hernandez et al. 2015		21
KT892948	Finland	H1c9	FTDNA		13
KU375201	Europe	U3*	FTDNA		18
KU682872	China	D2a’b	Zheng et al. 2017	12
KU682880	China	D4	Zheng et al. 2017	12
KU682913	China	C4b1	Zheng et al. 2011	19
KU683046	China	C4*	Zheng et al. 2017	18
KU683291	China	C4b3	Zheng et al. 2017	20
KU683349	China	D4j1	Zheng et al. 2017	16
KU683591	China	H+16291	Zheng et al. 2017		12
KU867593	Iberia	H3	Gomez-Carballa et al. 2011		12
KU867609	Iberia	U5b1+16189	Gomez-Carballa et al. 2017		20
KU953390	Finland	U5a2a1a	FTDNA		20
KU961661	England	U5b2b2	FTDNA		20
KY123267	Switzerland	U5b1+16189	FTDNA		20
KY409912	Italy	U8b1b	Olivieri et al. 2017		25
KY411443	Italy	U3*	Larruga et al. 2017
KY411448	Arabia	U4d	Larruga et al. 2017		21
KY411460	Germany	U3a1	Larruga et al. 2017		21
KY411461	Iberia	U3a1	Larruga et al. 2017		25
KY452024	Sweden	U5b1	FTDNA		19
KY620272	Finland	H1a7	FTDNA		11
KY656559	Finland	U5a1a1	FTDNA		21
KY670890	Russia	H*+16189	Malyarchuk et al. 2018		11
KY670894	Russia	H10e	Malyarchuk et al. 2018		12
KY670910	Russia	H1b	Malyarchuk et al. 2018		11
KY670982	Russia	HV	Malyarchuk et al. 2018		11
KY671009	Russia	U4d1	Malyarchuk et al. 2017		21
KY671113	Russia	H+16291	Malyarchuk et al. 2017		12
KY680993	Ecuador	D4h3a	Brandini et al. 2017	27
KY782201	Poland	U4d1	Malyarchuk et al. 2017		24
KY797214	Lebanon	U4a	Matisoo-Smith et al. 2016		19
KY782244	Poland	H5a	Malyarchuk et al. 2018		13
KY797180	Lebanon	X2d1	Matisoo-Smith et al. 2018		16
KY797191	Lebanon	T*	Matisoo-Smith et al. 2018		18
KY967268	Germany	U5b1d1	FTDNA		21
KX146835	India	C*	Khan et al. 2016	17
KX243271	Finland	U8a1a1b1	FTDNA		22
KX358472	Belarus	D4j	Pankratov et al. 2016	13
KX440331	Iberia	T2b3+151	Pereira et al. 2017		26
KX456629	Thailand	M71+151	Kutanan et al. 2017	14
KX456851	Thailand	F1a1a1	Kutanan et al. 2017		29
KX457606	Thailand	F1a1a1	Kutanan et al. 2017		24
KX457120	Thailand	F1a1a1	Kutanan et al. 2017		25
KX459519	Sweden	X2+225	FTDNA		13
KX495674	Armenia	U4d	FTDNA		19
KX675322	Kyrgyzstan	K1a	Marchi et al. 2017		23
Amman	Jordan	U4a	Gonzalez et al. 2008		23
MF043505	Russia	F1b1f	Derenko et al. 2018		21
MF166725	Bulgaria	J1c	FTDNA		23
MF172950	Sweden	U5b2b1a1	FTDNA		23
MF177143	Poland	U4a	Skonieczna et al. 2018		19
MF278019	Sweden	U5a1a1	FTDNA		16
MF362882	Turkey	U8b1a1	Margaryan et al. 2017		26
MF437085	UAE	H13c1	Al-Jasmi et al. 2020		13
MF437126	UAE	X2m’n	Al-Jasmi et al. 2020		18
MF497502	Finland	K1a2c	Jarviaho et al. 2017		30
MF497508	Finland	H10g	Jarviaho et al. 2017		10
MF497520	Finland	U4d1	Jarviaho et al. 2017		22
MF522844	Pamir	U5b2	Peng et al.2017		25
MF523078	Pamir	G3a1	Peng et al.2017	13
MF523104	Pamir	D4	Peng et al.2017	14
MF523108	Pamir	N1a1b	Peng et al.2017		25
MF523032	Pamir	C1f	Peng et al.2017	20
MF686118	Finland	H1a7	FTDNA		11
MF523138	Pamir	B4c1a	Peng et al.2017		19
MF523149	Pamir	U3*	Peng et al.2017		17
MG031162	Finland	W6	FTDNA		21
MG182027	Morocco	M1b1	Font-Porterias et al. 2018	18
MG182426	Finland	J1c2	FTDNA		19
MG272585	Thailand	F1a1a1	Kutanan et al. 2018		26
MG272862	Thailand	M71+151	Kutanan et al. 2018	16
MG272936	Thailand	G2b1a	Kutanan et al. 2018	13
MG386698	Sweden	V*	FTDNA		10
MG496254	Iberia	J1c1b1	FTDNA		26
MG548631	Sweden	V*	FTDNA		15
MG551914	Sweden	H85	FTDNA		12
MG595757	Finland	H*+16189	FTDNA		9
MG646082	Poland	G2a1	Piotrowska-Nowak et al. 2018	17
MG646088	Poland	H10a	Piotrowska-Nowak et al. 2018		9
MG646124	Poland	K1	Piotrowska-Nowak et al. 2018		26
MG646155	Poland	H*+152	Piotrowska-Nowak et al. 2018		12
MG646247	Poland	T2b	Piotrowska-Nowak et al. 2018		24
MG646273	Poland	U8b1a2b	Piotrowska-Nowak et al. 2018		24
MG660543	Altai	A*	Nazhmidenova et al. 2020		18
MG660624	Russia	C4a1a3	Dryomov et al. 2015	23
MG660639	Russia	U5a2a1b	Dryomov et al. 2015		19
MG660641	Russia	A10	Dryomov et al. 2015		18
MG660728	Russia	F1b1b	Dryomov et al. 2015		24
MG882074	Sweden	H1	FTDNA		11
MG952806	Hungary	K1c1	Malyarchuk et al. 2018		23
MG952849	Hungary	H12a	Malyarchuk et al. 2018		12
MH057392	Finland	U5b1b1a	FTDNA		20
MH087473	Finland	H13a1a1d	FTDNA		19
MH118552	Finland	T2b	FTDNA		24
MH120577	Poland	N1a1a1a	Piotrowska-Nowak et al. 2018		24
MH120602	Poland	J1c1	Piotrowska-Nowak et al. 2018		27
MH120663	Poland	U8a1a1b1	Piotrowska-Nowak et al. 2018		24
MH120668	Poland	U5a2d	Piotrowska-Nowak et al. 2018		18
MH120700	Poland	U5b2c	Piotrowska-Nowak et al. 2018		22
MH120724	Poland	X4	Piotrowska-Nowak et al. 2018		16
MH120759	Poland	U5b1a	Piotrowska-Nowak et al. 2018		22
MH120762	Poland	U5b1b	Piotrowska-Nowak et al. 2018		21
MH120784	Poland	K2a	Piotrowska-Nowak et al. 2018		19
MH120811	Poland	K1a1a	Piotrowska-Nowak et al. 2018		24
MH158250	Sweden	U8a1a1	FTDNA		20
MH449500	Vietnam	M71+151	Duong et al. 2018	11
MH449521	Vietnam	M71+151	Duong et al. 2018	11
MH553742	China	A*	Zhao et al. 2019		20
MH553914	China	B4'5	Zhao et al. 2019		19
MH587794	Bulgaria	X2b4	FTDNA		18
MH605005	Finland	T2b	FTDNA		22
MH777993	Scotland	H3	FTDNA		11
MH807359	Siberia	C4b1	Dryomov et al. 2020	18
MH807360	Siberia	N9b	Dryomov et al. 2020		11
MH807371	Siberia	N9b1	Dryomov et al. 2020		14
MH899455	Norway	H1	FTDNA		13
MH981823	Paraguay	C1b	Simao et al. 2019	22
MK134338	Serbia	X2m	Malyarchuk et al. 2018		16
MK180574	Siberia	D3	Dryomov et al. 2020	18
MK217164	Iraq	U5a	Shamoon-Pour et al. 2019		25
MK217207	Iraq	X2	Shamoon-Pour et al. 2019		13
MK217211	Iraq	u5a1	Shamoon-Pour et al. 2019		22
MK372307	Czechia	H+16291	FTDNA		12
MK391752	Caucasus	U5a1	FTDNA		19
MK398244	Finland	H28a	FTDNA		11
MK408596	Finland	H10g	FTDNA		10
MK408598	Russia	U5b1d1	FTDNA		17
MK434283	England	T2b	FTDNA		23
MK491374	Armenia	H13c1	Derenko et al. 2019		13
MK491441	Turkey	X2d1	Derenko et al. 2019		16
MK491484	Turkey	K1a	Derenko et al. 2019		21
MK617242	Serbia	K1a2	Davidovic et al. 2015		25
MK732952	Finland	U4b1b1b	FTDNA		28
MK860632	USA	B2b	Wood et al. 2019		21
MN046411	Iberia	H3	Garcia et al. 2020		9
MN046449	Iberia	K1a3a	Garcia et al. 2020		22
MN046450	Iberia	T2b33	Garcia et al. 2020		26
MN046462	Iberia	U5a1c	Garcia et al. 2020		21
MN046583	Iberia	U3*	Garcia et al. 2020		21
MN176263	Poland	U8b1a2b	Piotrowska-Nowak et al. 2018		26
MN413230	Russia	K1c	Starikovskaya et al. 2019		23
MN516554	Finland	U8a1a1	Kiiskila et al. 2019		22
MN516567	Finland	U5a2a1e	Kiiskila et al. 2019		19
MN516568	Finland	T1a1	Kiiskila et al. 2019		24
MN516570	Finland	H1a2	Kiiskila et al. 2019		11
MN516572	Finland	H2a1c	Kiiskila et al. 2019		11
MN516577	Finland	H1c9	Kiiskila et al. 2019		11
MN516584	Finland	T2b	Kiiskila et al. 2019		24
MN516589	Finland	H10g	Kiiskila et al. 2019		11
MN516591	Finland	H1b	Kiiskila et al. 2019		11
MN516593	Finland	U5b1b1a1	Kiiskila et al. 2019		20
MN516605	Finland	H3	Kiiskila et al. 2019		11
MN516610	Finland	H49	Kiiskila et al. 2019		11
MN516651	Finland	U5b2a1a	Kiiskila et al. 2019		20
MN516652	Finland	H1a8a	Kiiskila et al. 2019		12
MN516655	Finland	U5b1b2	Kiiskila et al. 2019		19
MN516669	Finland	H27a	Kiiskila et al. 2019		12
MN516677	Finland	H1b2	Kiiskila et al. 2019		13
MN516679	Finland	J1c2c1	Kiiskila et al. 2019		23
MN516759	Finland	U4d1a1a	Kiiskila et al. 2019		24
MN597067	Russia	H*+16189	FTDNA		10
MN610421	Macedonia	H*+152	Bianco et al. 2020		12
MN687113	Italy	K1	Modi et al. 2020		24
MN687116	Italy	X2b+226	Modi et al. 2020		16
MN687128	Italy	T2b	Modi et al. 2020		24
MN687130	Italy	H3	Modi et al. 2020		19
MN687161	Italy	X2	Modi et al. 2020		12
MN687220	Italy	X2	Modi et al. 2020		11
MN687241	Italy	U5a1	Modi et al. 2020		19
MN687274	Italy	U8b1b1	Modi et al. 2020		16
MN687287	Italy	H4a1a	Modi et al. 2020		17
MN687292	Italy	K1a2a	Modi et al. 2020		25
MT739813	Poland	U5b1	FTDNA		25
NA18539	China	K3	Zheng et al. 2011		30
References
Al-Jasmi et al. 2020. Genomic landscape of the mitochondrial genome in the United Arab Emirates native population. Genes 11(8), 876.
Barbieri et al. 2012. Contrasting maternal and paternal histories in the linguistic context of Burkina Faso. Mol. Biol. Evol. 29(4), 1213-1223.
Behar et al. 2012. A "Copernican" reassessment of the human mitochondrial DNA tree from its root. Am. J. Hum. Genet. 90(4), 675-684.
Bianco et al. 2020. Recent common origin, reduced population size, and marked admixture have shaped European Roma genomes. Mol. Biol. Evol. 156.
Bilal et al. 2008. Mitochondrial DNA haplogroup D4a is a marker for extreme longevity in Japan. PLoS ONE 3(6), e2421.
Brandini et al. 2017. The Paleo-Indian entry into South America according to mitogenomes. Mol. Biol. Evol. 35(2), 299-311.
Coia et al. 2016. Whole mitochondrial DNA sequencing in Alpine populations and the genetic history of the Neolithic Tyrolean Iceman. Sci.Rep. 6, 18932.
Davidovic et al. 2015. Mitochondrial DNA perspective of Serbian genetic diversity. Am.J.Phys.Anthropol. 156(3), 449-465.
Derenko et al. 2010. Origin and post-glacial dispersal of mitochondrial DNA haplogroups C and D in northern Asia. PloS ONE 5(12), e15214.
Derenko et al. 2014. Western Eurasian ancestry in modern Siberians based on mitogenomic data. BMC Evol.Biol. 14(1), 217.
Derenko et al. 2018. Mitogenome diversity and differentiation of the Buryats. J.Hum. Genet. 63(1), 71-81.
Derenko et al. 2019. Insights into matrilineal genetic structure, differentiation and ancestry of Armenians based on complete mitogenome data. Mol. Genet. Genomics 294(6), 1547-1559.
Duggan et al. 2013. Investigating the prehistory of Tungusic peoples of Siberia and the Amur-Ussuri region with complete mtDNA genome sequences and Y chromosome markers. PLoS ONE 8(12), E83570.
Duong et al. 2018. Complete human mtDNA genome sequences from Vietnam and the phylogeography of mainland southeast Asia. Sci. Rep. 8(1), 11651.
Dryomov et al. 2015.Mitochondrial genome diversity at the Bering strait area highlights prehistoric human migrations from Siberia to northern NorthAmerica. Eur.J.Hum. Genet. 10(1399), 404.
Dryomov et al. 2020. Genetic legacy of cultures indigenous to the northeast Asian coast in mitochondrial genomes of nearly extinct maritime tribes. BMC Evol.Biol. 20, 83.
Fedorova et al. 2013. Autosomal and uniparental portraits of the native population of Sakha (Yakutia): implications for the peopling of northeast Eurasia. BMC Evol. Biol. 13(1), 127.
Fernandes et al. 2012. The Arabian cradle: mitochondrial relicts of the first steps along the southern route out of Africa. Am.J.Hum.Genet. 90(2), 347-355.
Finnila et al. 2001. Phylogenetic network for European mtDNA. Am. J. Hum. Genet. 68(6), 1475-1484.
Font-Porterias et al. 2018. The genetic landscape of mediterranean North African populations through complete mtDNAs. Ann. Hum. Biol. 45(1), 98-104.
Fraumene et al. 2006. High resolution analysis and phylogenetic network construction using complete mtDNA sequences in sardinian genetic isolates. Mol.Biol.Evol. 23(11), 2101-2111.
Garcia et al. 2020. Forensically relevant phylogeographic evaluation of mitogenome variation in the Basque country. For.Sci.Int.Genet. 46, 102260.
Gil-Bolardo et al. 2010. Impact of the mitochondrial genetic background in complex III deficiency. PloS ONE 5(9), E12801.
Gomez-Carballa et al. 2011. Evolutionary analyses of entire genomes do not support the association of mtDNA mutations with RAS/MAPK pathway syndromes PloS ONE 6(4), e18348.
Gomez-Carballa et al. 2017. Phylogenetic and population based approaches to mitogenome variation do not support association with male infertility. J.Hum.Genet. 62(3), 361-371.
Gomez-Duran et al. 2010. Unmasking the causes of multifactorial disorders: OXPHOS differences between mitochondrial haplogroups. Hum. Mol. Genet. 19(17),3343-3353.
Gonzalez et al. 2008. Mitochondrial DNA variation in Jordanians and their genetic relationship to other Middle East populations. Ann. Hum. Biol. 35(2), 212-231.
Hernandez et al. 2015. Early Holocenic and historic mtDNA-African signatures in the Iberian Peninsula: The Andalusian region as a paradigm. PloS ONE 10(10), E0139784.
Ingman and Gyllensten 2007. Rate variation between mitochondrial domains and adptive evolution in humans. Hum. Mol. Genet. 16(19), 2281-2287.
Li et al. 2014. Variation and association to diabetes in 2000 full mtDNA sequences mined from an exome study in a Danish population. Eur. J. Hum. Genet. 22, 1040-1045.
Harviaho et al. 2017. Novel non-neutral mitochondrial DNA mutations found in childhood acute lymphoblastic leukemia. Clin. Genet. 93(2), 275-285.
Jiang et al. 2014. Mitochondrial DNA 10609T promotes hypoxia-induced increase of intracellular ROS and is a risk factor of high altitude polycythemia. PloS ONE 9(1), E87775.
Just et al. 2014. Full mtGenome reference data: Development and characterization of 588 forensic-quality haplotypes representing three U.S. populations. FSI Genetics 14C, 141-155.
Kazuno et al. 2008. Mitochondrial DNA dependent effects of valproate on mitochondrial calcium levels in transmitochondrial cybrids. Int. J. Neuropsychopharmacol. 11(1), 71-78.
Khan et al. 2017. Leber’s hereditary optic neuropathy specific mutation m.11778G>A exists on diverse mitochondrial haplogroups in India. Invest.Ophthalmol. And Visual Science 58(10), 3923.
Kiiskila et al. 2019. Analysis of functional variants in mitochondrial DNA of finnish athletes. BMC Genomics 20(1), 784.
Kloss-Brandstaetter et al. 2015.Validation of next-generation sequencing of entire mitochondrial genomes and the diversity of mitochondrial DNA mutations in oral squamous cell carcinoma. PloS ONE 10(8), e0135643.
Kloss-Brandstaetter et al. 2018. Mitochondrial population structure in Cambodia. Unpublished.
Kong et al. 2004. Phylogeny of east Asian mitochondrial DNA lineages inferred from complete sequences. Am.J.Hum.Genet. 73(3), 671-676.
Kong et al. 2011. Large-scale mtDNA screening reveals a surprising maternal complexity in East Asia and its implications to the peopling of the region. Mol.Biol.Evol. 28(1), 513-522.
Kutanan et al. 2017. Complete mitochondrial genomes of Thai and Lao populations indicate an ancient origin of Austroasiatic groups and demic diffusion in the spread of Tai-Kadai languages. Hum. Genet. 136(1), 85-98.
Kutanan et al. 2018. New insights from Thailand into the maternal genetic history of mainland southeast Asia. Eur. J. Hum. Genet. 26(6), 898-911.
Lippold et al. 2014. Human paternal and maternal demographic histories: insights from high-resolution Y-chromosome and mtDNA sequences. Invest. Genet. 5, 13.
Maca-Meyer et al. 2001. Major genomic mitochondrial lineages delineate early human expansions. BMC Genet. 2(1), 13.
Maca-Meyer et al. 2003. Mitochondrial DNA transit between West Asia and North Africa inferred from U phylogeography. BMC Genet. 4, 15.
Malyarchuk et al. 2010. The peopling of Europe from the mitochondrial haplogroup U5 perspective. PloS ONE 5(4), e10285.
Malyarchuk et al. 2017. Mitogenomic diversity in Russian and Poles. Forensic Sci. Int. Genet. 30, 51-56.
Malyarchuk et al. 2018. Whole mitochondrial genome diversity in two hungarian populations. Mol.Genet.Genomics 293(5), 1255-1263.
Marchi et al. 2017. Sex-specific genetic diversity is shaped by cultural factors in Inner Asian human populations. Am. J. Phys. Anthropol. 162(4), 627-640.
Margaryan et al. 2017. Eight millennia of matrilineal genetic continuity in the south Caucasus. Curr. Biol. 27(13), 2023-2028.
Matisoo-Smith et al. 2016. A European mitochondrial haplotype identified in ancient phoenician remains from Carthage, North Africa. PloS ONE 11(5), e0155046.
Matisoo-Smith et al. 2018. Ancient mitogenomes of Phoenicians from Sardinia and Lebanon: A story of settlement, integration, and female mobility. PloS ONE 13(1), e0190169.
Mielnik-Sikorska et al. 2013. The history of slavs inferred from complete mitochondrial genome sequences. PloS ONE 8(1), e54360.
Mikami et al. 2013. Comprehensive analyis of common and rare mitochondrial DNA variants in elite japanese athletes: case-control study. J.Hum.Genet. 58(12), 780-787.
Modi et al. 2020. The mitogenome portrait of Umbria in Central Italy as depicted by contemporary inhabitants and pre-Roman remains. Sci. Rep. 10(1), 10700.
Montiel-Sosa et al. 2006. Differences of sperm motility in mitochondrial DNA haplogroup U sublineages. Gene 368, 21-27.
Nazhmidenova et al. 2020. Complete mtDNA genomes from near-extinct tribes in the Altai: new insights into South-Central Siberian prehistory. Unpublished.
Olivieri et al. 2017. Mitogenome diversity in Sardinians: a genetic window onto an Island’s past. Mol. Biol. Evol. 34(5), 1230-1239.
Pala et al. 2009. Mitochondrial haplogroup U5b3: a distant echo of the epipaleolithic in Italy and the legacy of the early sardinians. Am.J.Hum:Genet. 84(6), 814-821.
Pala et al. 2012. Mitochondrial DNA signals of late glacial recolonization of Europe from near eastern refugia. Am.J.Hum.Genet. 90(5), 915-924.
Pankratov et al. 2016. East Eurasian ancestry in the middle of Europe: genetic footprints of steppe nomads in the genomes of Belarussian Lipka tatars. Sci. Rep. 6, 30197.
Penarun et al. 2012. Divorcing the Late Upper Palaeolithic demographic histories of mtDNA haplogroups M1 and U6 in Africa. BMC Evol. Biol. 12(1), 234.
Peng et al. 2018. Mitochondrial genomes uncover the maternal history of the Pamir populations. Eur.J.Hum.Genet. 26, 124-136.
Perego et al. 2009. Distinctive Paleo-Indian migration routes from Beringia marked by two rare mtDNA haplogroups. Curr. Biol. 19(1), 1-8.
Pereira et al. 2010. Population expansion in the North African Late Pleistocene signalled by mitochondrial DNA haplogroup U6. BMC Evol. Biol. 10(1), 390.
Pereira et al. 2017. Reconciling analyses of ancient and contemporary genomes: A major source for the European neolithic within Mediterranean Europe. Proc. Biol. Sci. 284(1851), 20161976.
Piotrowska-Nowak et al. 2018. New mtDNA association model, mutPred variant load, suggests individuals with multiple mildy deleteriours mtDNA variants are more likely to suffer from atherosclerosis. Front. Genet. 9,702.
Qin et al. 2010. A mitochondrial revelation of early human migrations to the Tibetan plateau before and after Last Glacial Maximum. Am.J.Phys.Anthropol. 143(4), 555-569.
Raule et al. 2014. The co-occurrence of mtDNA mutations on different oxidative phosphorylation subunits not detected by haplogroup analysis, affects human longevity and is population specific.Aging Cell 13(3), 401-407.
Rieux et al. 2014. Improved calibration of the human mitochondrial clock using ancient genomes. Mol. Biol. Evol. 31(10), 2780-2792.
Sarac et al. 2014. Maternal genetic heritage of southeastern Europe reveals a new croatian isolate and a novel sub-branching in the X2 haplogroup. Ann.Hum.Genet. 78(3), 178-194.
Schoenberg et al. 2011. High-throughput sequencing of complete human mtDNA genomes from the Caucasus and West Asia: high diversity and demographic inferences. Eur.J.Hum.Genet. 19, 988-994.
Secher et al. 2013. The history of the North African mitochondrial DNA haplogroup U6 gene flow into the African, Eurasian and American continents. BMC Evol. Biol. 14, 109.
Shamoon-Pour et al. 2019. Population history of Assyrians: A mitogenomic perspective.
Simao et al. 2019.The maternal inheritance of Alto Parana revealed by full mitogenome sequences. For. Sci. Int. Genet. 39, 66-72.
Skonieczna et al. 2018. Mitogenomic differences between the normal and tumor cells of colorectal cancer patients. Hum. Mutat. 39(5), 691-701.
Soares et al. 2008. Climate change and post-glacial human dispersals in southeast Asia. Mol. Biol. Evol. 25(6), 1209-1218.
Soini et al. 2013. Mitochondrial DNA variant m.15218 A>G in Finnish epilepsy patients who have maternal relatives with epilepsy, sensorineural hearing imparment or diabetis mellitus. BMC Med.Genet. 14, 73.
Starikovskaya et al. 2005. Mitochondrial DNA diversity in indigenous populations of the southern extent of Siberia and the origins of Native American haplogroups. Ann.Hum.Genet. 69(PT1), 67-89.
Starikovskaya et al. 2019. Mitochondrial DNA variation of Leber’s hereditary optic neuropathy in western Siberia. Cells 8(12), 1574.
Sukernik et al. 2012. Mitochondrial genome diversity in the Tubalar, Even, and Ulchi: contribution to prehistory of native Siberians and their affinities to native Americans. Am.J.Phys.Anthropol. 148(1), 123-138.
Tamm et al. 2007. Beringian stadstill and spread of Native American founders. PloS ONE 2(9), e829.
Tanaka et al. 2004. Mitochondrial genome variation in eastern Asia and the peopling of Japan. Genome Res. 14(10A), 1832-1850.
Volodko et al. 2008. Mitochondrial genome diversity in arctic siberians, with particular reference to the evolutionary history of Beringia and Pleistocenic peopling of the Americas. Am.J.Hu.Genet. 82(5), 1084-1100.
Wang et al. 2007. Somatic mutations of mitochondrial genome in early stage breast cancer. Int. J. Cancer 121(6), 1253-1256.
Zhao et al. 2019. Mitochondrial haplogroups N9 and G are associated with metabolic syndrome among HIV-infected patients in China. AIDS Res.Hum.Retroviruses 35(6), 536-543.
Zheng et al. 2011. Major population expansion of East Asians began before Neolithic time: Evidence of mtDNA genomes. PloS ONE 6(10), e25835.
Zheng et al. 2017. MtDNA genomes revealed a relaxation of selective constrains in low-BMI individuals of a Uyghur population. Hum. Genet. 136(10), 1353-1362.

## Sheet: Stable 3
Supplementary Table 3: Sequences with the highest number of mutations within haplogroups
			Mutations from the root
Sequence Access	Haplogroup	Region	Haplogroup L	Haplogroup M	Haplogroup N
KF672800	L0g	Zambia	87
EU092844	L0d2c1a1	Africa	85
KC346052	L0d2c2a1a	Botswana	85
EF184587	L0d3a	Tanzania	87
MF056564	L0f	Madagascar	88
EF184595	L0f1	Tanzania	85
EF184596	L0f2a	Tanzania	87
KF672828	L0f2b	Sudan	88
KC346121	L0k1b	Namibia	86
F672797	L0k2a1	Mozambique	86
X303753	L0k2a1a	Zambia	85
KC346242	L0k2b	Zambia	85
JN655813	L3a1a	Somalia	23
JN655774	L3a1b	Ethiopia	23
KT819256	L3b1	Morocco	24
KT819259	L3b1a5	Morocco	24
EU935440	L3b2a	Egypt	24
MF621068	L3b1a2	Sudan	23
MF621069	L3b2b	Mali	23
JN655842	L3f1a1	Sudan	26
KJ185713	L3f1b1a1	Zambia	26
EU092877	L3f2b	Chad	26
EU092883	L3f1b3	Chad	25
KF451440	L3f1b1a	Nigeria	25
DQ341074	L3c	Ethiopia	24
JQ044842	L3d1c1	Burkina Faso	26
EU092762	L3d1c	Egypt	25
KC622090	L3d3a1	Khoisan	24
JQ045070	L3e1g	Burkina Faso	26
MF055750	L3e3b1	Madagascar	25
JQ044964	L3e3b3	Burkina Faso	23
JX303847	L3e1d1	Zambia	23
KM986621	L3i2	Yemen	19
KP229453	L3i1	East Africa	18
EU092822	L3k	Libya	22
JN655789	L3k1	Chad	22
MF621095	L3x2a1a	Jordan	28
DQ341066	L3x2a1	Ethiopia	27
JN655776	L3x2a	Ethiopia	25
KJ185535	L3h1b2	Angola	38
JQ044990	L3h1b	Burkina Faso	35
MF621100	L3h1a2a1	Kenya	32
JN655825	L3h2	Sudan	30
EF060326	M1a1d	Ethiopia		25
MF695935	M1a1b	Kenya		25
KX457044	M20a1	Thailand		30
GU810058	M20b	Thailand		28
KC505100	M51b1b	Cambodia		27
EU443498	M2b1b	India		30
GQ337585	M2b1a	India		29
GQ337678	M2b1c	India		29
FJ383482	M3c1b1a	India		18
KR074240	M3c1b1	Arabia		18
JX452733	M3c1b	India		17
GQ337609	M4'67	India		16
JX462703	M65a1	India		17
FJ383294	M67	India		16
DQ408674	M18a	India		15
FJ383335	M18b1	India		15
FJ383405	M38b	India		25
KP345978	M38	Myanmar		21
KM043056	M30b	India		16
DQ246827	M30	India		15
DQ246818	M30f	India		15
FJ383686	M37	India		16
FJ383429	M43a	India		18
GQ337636	M45a	India		20
KP346034	M54	Myanmar		20
FJ383738	M63	India		12
FJ383813	M64	India		17
AY922283	M66b	India		16
MH449488	M5	Vietnam		27
FJ383550	M5b2b1	India		22
MH444422	M6	India		25
AY922307	M6a1b	India		24
KF540556	M7b1a2a1a	Taiwan		31
KF540589	M7b1a2a1b1	Taiwan		28
KC994153	M7b1a2a1	Philippines		28
FJ198221	M7b1a1c1	China		27
MH449405	M7b1a1a2	Vietnam		27
MG273119	M8a2a1	Thailand		25
KX358499	C4a1a	Belarus		31
KU683469	C4a1a2	Uyghur		30
FJ383600	C4a1a1a	Nepal		30
AY615360	C4a1a3a1	Tofalar		29
FJ951552	C4a1a3b	Bargut		29
KF056247	C4a2b2a	Tibet		29
KJ946439	C1c	Mexico		29
KJ923826	C1d1	Brazil		29
MH120737	C4a1a1	Poland		28
KF056244	C4a2b2	Tibet		28
KJ923830	C1c3	Colombia		28
KT725949	Z3a	Tibet		27
MH449093	Z3a1a	Vietnam		25
AP008305	Z4a1a1	Japan		25
HM346890	M9a	China		20
KU683086	M9a1a1c1a	Uyghur		19
GU733774	E2b1	Philippines		23
KJ154836	E1a2a3	PNG		22
JN857013	M10a1a1b1	Russia		28
KF849941	M10a1a1b	China		27
KU683277	M10a1	Uyghur		26
AP010748	M10a1a1b2	Japan		26
MG660589	M11d	Altai		22
JQ411473	M11	China		21
KT725921	M11a2	Tibet		21
KC709481	M11c	Korea		21
HQ157983	M12a1b	Hainan		34
KX456983	M12a1a	Thailand		32
AP008358	G2a1d1a	Japan		25
AP009446	G4	Japan		23
KF849950	G2c	China		22
KU683017	G2a	Uyghur		22
KT726109	G2a	Tibet		22
JX462680	M13a1	India		26
GQ895167	M13a2	China		26
KJ446420	M13c	China		25
KT587629	M46	Cambodia		23
MG272997	M61	Thailand		31
EF495222	M14	Australia		28
EF495219	M15	Australia		21
MG272706	M17a	Thailand		40
KT587575	M17c	Cambodia		25
KT587412	M17c1a1a	Cambodia		21
DQ408674	M18a	India		15
FJ383335	M18b1	India		15
KX457501	M19	Thailand		18
GQ337586	M53b	India		20
MG272698	M21b	Thailand		28
KT587480	M21b2	Cambodia		25
MH449527	M21b3	Vietnam		23
GQ337652	M22b	India		25
FJ543102	M23	Madagascar		22
HM030540	M75	China		26
	M24	Thailand		15
	M41	India		15
KJ154830	M25	Solomon		18
KT587376	M26	Cambodia		16
DQ137410	M27a1a1	PNG		31
DQ137402	M27b1	PNG		30
KJ154707	M27b2a	Solomon		30
KJ154736	M28a2a	Solomon		28
DQ137398	M28b	PNG		27
DQ137407	M29a	PNG		22
KF451091	Q1	PNG		31
GQ214527	Q2a1	New Guinea		31
KJ154444	Q1e1	Fiji		30
DQ408673	M31a1b	Andaman		21
HQ438683	M31a2	Andaman		20
KX457460	M32c	Thailand		25
FJ383486	M56	India		11
HM030510	M33b1	China		23
JX462713	M33d	India		20
KP346017	M33a	Myanmar		19
JX462718	M34a1	India		23
AY922304	M34a1a	India		20
FJ383762	M57a	India		21
FJ770956	M35	Nepal		18
AY922279	M35a2	India		16
FJ383810	M36c	India		15
FJ383807	M36d	India		15
FJ383686	M37	India		16
KX456758	M37e	Thailand		15
FJ383405	M38b	India		25
KP345978	M38	Myanmar		21
EF556151	M39a1	India		17
FJ383706	M39a2	India		17
MH449203	M70	Vietnam		17
FJ383424	M40a1a	India		21
FJ383717	M41a1	India		15
KY595641	M42a1a	Australia		25
AF346965	M42a1b	Australia		25
KY595582	M42c2	Australia		28
FJ380216	M42b2	India		27
FJ380213	M42b1	India		25
HM030520	M74b	China		22
KX456710	M74b2	Thailand		22
FJ383747	M44a	India		11
	M47	Indonesia		only CR
	M48	Thailand		10
FJ383733	M49a1	India		15
FJ383767	M49c1	India		15
JX289099	M49e1	Myanmar		15
KP346020	M50	Myanmar		22
JX289098	M50a2	Myanmar		22
GQ337635	M50	India		21
FJ383491	M52b1a	India		21
JX462717	M52a1b	India		20
KC993962	M52a1b1	Philippines		20
KP346057	M55	Myanmar		20
MK128885	M77	Indonesia		16
KP346013	M58	Myanmar		21
KC505104	M59	Cambodia		23
KY686209	M60	Indonesia		14
JF742204	M60b	Nepal		14
FJ544237	M62b1a1	Tibet		25
FJ544241	M62b1a	Tibet		21
KT587533	M68a1	Cambodia		27
KC887482	M68a1a	Cambodia		27
HM596653	M69	Sumatra		27
KX456923	M71	Thailand		18
GQ119038	M71a2	Philippines		18
HM030502	M71a1a	China		16
GU810024	M71c	Thailand		16
GQ301881	M72a	China		15
	M73	Indonesia		20
	M73	Cambodia		19
	M79	Thailand		19
HM030525	M76	China		25
KX457559	M76a	Thailand		23
JX462697	M81	India		14
JX289130	M91a	Myanmar		28
HM030537	M91a	China		27
JF739537	M80	Philippines		19
FJ168728	D4h3a3	Chile		29
FJ168713	D4h3a1	Chile		28
AP008777	D5b2	Japan		28
KY680993	D4h3a	Ecuador		27
FJ468721	D4h3a1a2	Chile		27
FJ168738	D4h3a5	Peru		27
FJ168742	D4h3152	Mexico		27
KR074256	D5c2	Japan		27
KU683499	D5c1a	Uyghur		27
FJ168718	D4h3a1a	Chile		26
FJ168747	D4h3a9	Peru		26
KU683040	D5b1c	Uyghur		25
AP008422	D4g2a	Japan		25
AP010720	D4b1a1	Japan		25
JN253410	D1g4	Chile		23
KU683579	D4b1	Uyghur		23
MT419357	D4b1a	Thailand		23
KT725930	D4h1c	Tibet		23
EF660993	N1b1a4a	Italy			30
MK007328	N1a1a1a3	Germany			29
HQ384201	N1b1a7	Iberia			29
JQ705378	I1a1a3	Germany			33
KX949567	I1a1d	England			33
KX156834	I1c1a	Chechenia			33
JQ245748	I1a1a3a	Czechia			32
KF161090	I1a1c	Denmark			32
AY714031	N5	India			19
KC911431	N2a1	Iran			22
KX467287	N2	India			21
KF450945	W3a1b	Pakistan			29
KF146290	W6b1	Iran			29
JQ703076	W5b1a	Netherlands			28
KY367263	W6	Armenia			28
JF275845	W6c	Iran			28
KC867134	N3a	Iran			23
KC911492	N3b	Iran			23
KC887494	N7a1	Cambodia			26
KT587575	N8	Cambodia			25
MH553652	N9a11	China			20
KX457138	N9a10	Thailand			19
AP008837	N9b	Japan			19
KU521486	Y2a1	Malaysia			23
KC994040	Y2a1a	Philippines			23
HM596672	Y2a1	Sumatra			22
HM030542	N10a	China			32
MK128893	N10	Indonesia			29
GU733752	N11b	Philippines			29
KF540803	N11a2	Taiwan			23
KY595661	N13	Australia			24
GQ301871	N21	Cambodia			20
HM596676	N22	Sumatra			17
MF043437	A	Mongolia			23
MH553742	A	China			20
AP008290	A5a1a1a	Japan			22
DQ462232	A5b	China			22
MG272728	A5b1	Thailand			22
MG272635	A13	Thailand			26
KF056300	A6b	Ladakh			25
KT726122	A17c	Tibet			24
JN580301	A15b	China			23
KY645926	A2ac	Colombia			28
JQ705348	A2n	Canada			28
EU095530	A2p	Ecuador			27
KY645594	A2q	Colombia			27
JQ965982	A2af1b1a	Panama			27
HQ012104	A2af1b2	Mexico			27
AY289059	O2	Australia			25
AY289066	S3	Australia			28
DQ404441	S1a	Australia			26
KM245146	X1c	Iberia			24
X2a1a1	EU095250	Sioux USA			23
KY409700	X2d1	Italy			22
JN415482	X2b11	Italy			21
JQ245775	X2e2b	Turkey			21
JQ705179	X2b6	Germany			21
MN046476	X2b6a	Basque			21
FJ168758	X2a1a	Sioux USA			21
AY195787	X2a2	Navajo USA			21
HM185253	R0a2k1	Yemen			23
HM185219	R0a2f1a	Yemen			21
HM185260	R0a1a2	Ethiopia			21
MF523097	HV2a	Pamir			23
JF260932	HV1d	Yemen			22
MF362849	HV2a1	Armenia			21
HQ412622	HV1b3a	Armenia			20
KX495645	H13a2c1	Bulgaria			24
FJ348185	H1e1a5	Germany			21
KF162873	H15b1	Denmark			21
JQ702410	H4a1a1a1a1	England			21
HQ661845	H3b1b1	England			20
JQ704851	H4a1a2a1	Scotland			20
JQ705248	H4a1a4b4	Norway			20
MG825657	H6a1a	Ukraine			20
KX499854	H6b1	Armenia			20
MN516558	H11a2a2	Finland			20
EU545449	R1a1a1a	Russia			26
KF162414	R1a1a2	Denmark			26
HM852870	R2b1	Turkey			26
JX155268	R2a	Arabia			22
JX152983	R2b	Finland			22
KF161345	J2a1a1a2	Denmark			35
HM852779	J1b1a2a	Armenia			34
KF161658	J2a1a1a	Denmark			33
MN516613	J2a1a1a1	Finland			33
JX153453	J2a1a2a1a	Calabria			33
MN046444	J2a1a1	Basque			32
KX440264	J2a2d	Algeria			32
MG660591	J1	Altai			31
JQ798061	T2b3a1	Sardinia			35
MN115376	T2f1a1	Ukraine			33
JQ798055	T2a1b1a1a2	England			32
EF556160	T2c1a1	Iraq			32
JQ798099	T2c1c1	Italy			32
KF161462	T2f1a1c1	Denmark			32
EF177441	T1a2a	Iberia			31
MK491473	T1a2b	Turkey			31
KU867621	T2b6b	Iberia			31
MN687194	T2f2	Italy			31
GU480010	R5a2	India			21
KJ446147	R5a2a	Pakistan			21
KY686207	R6a1	Myanmar			28
GU170819	R7b2	India			30
FJ004830	R7b1a1	India			27
FJ770970	R7a1a	Pakistan			26
JF742196	R8a1a1a2	Nepal			26
MT419029	R9c1a	Thailand			22
GU733759	R9c1a	Philippines			21
MG660552	R9b1a2a	Altai			19
KF849982	F1b1c	China			31
KX675320	F1b1	Kyrgyztan			30
KX456851	F1a1a1	Thailand			29
MG660693	F1b1b	Russia			29
KF540698	F3a1	Taiwan			29
MK128814	F3b1b	Indonesia			29
KC994030	F3b1b1	Philippines			29
KF451700	R11b1b	China			23
JN857012	R11b1a	Russia			22
KU521495	B5b1c	Malaysia			35
KC994036	B5b1c1a	Philippines			35
GQ119041	B5b2a2a2	Philippines			35
AP008875	B5b1a2a	Japan			34
AY519489	B5b2a	Siberia			34
KU683273	B5b2	Uyghur			33
KP240790	B5b1a	China			32
KC994111	B5b1c1	Philippines			32
MG637121	B2b3a	Uruguay			31
JQ703872	B2g1	Mexico			30
KY680889	B2b4	Ecuador			28
JX669226	B2y	Peru			28
AP008788	B4f	Japan			27
MH449217	B4	Vietnam			26
KX457316	B4b1a2a	Thailand			25
KU683454	B4b1a3a	Uyghur			25
KX457614	B4e	Thailand			25
KC993925	R24a1	Philippines			18
DQ112752	R12	Australia			22
AY963584	R21	Malaysia			28
AP012370	R21	Malaysia			27
MG272612	R21	Thailand			26
EF495216	R14	PNG			24
KT587441	R22	Cambodia			27
KP346018	R22	Myanmar			26
MT419289	R22	Thailand			26
KF451242	R23	Cambodia			23
KF038316	R30b1	India			34
KU683250	R30b1	Uyghur			29
KU682990	R30	Uyghur			28
GU170818	R30a1b1	India			27
AY714048	R31b	India			32
FJ004825	R31a1	India			36
KC577355	R32	Mauritius			22
KY595651	P6b	Australia			36
EF061157	P4a1	PNG			34
KC994148	P10	Philippines			33
EF061154	P3b1a	Australia			31
KY595617	P12a	Australia			30
MK217149	U1a1a3	Iraq			34
KC911607	U1a1b	Iran			34
FJ916904	U5b2b3a1a	Denmark			28
KC175644	U5a1a2a1a	England			27
MG646202	U5a1d2a1	Poland			27
EF064326	U6a3e	Morocco			24
JX120767	U6a7a1a	France			24
JX120776	U6a2a2a	Ethiopia			23
JX120718	U6a3c1	Ghana			23
KF162087	U2e1f1	Denmark			33
MF523147	U2b2	Pamir			30
KC533515	U2a2	India			27
KX495668	U3a3	Armenia			31
KC911314	U3a2a1a	Iran			25
KY411465	U3a2a1a	Jordan			25
MG609036	U4b1b1b	Sweden			28
KF163023	U4b1a2a	Denmark			25
MN687245	U4b1a1a1	Italy			25
AY882390	U9	Pakistan			25
EJ770944	U9	India			25
KY824871	U7a4a1a	Turkey			28
KY824883	U7a5	Turkey			25
HM852886	K3	Georgia			32
KC911536	U8b1a2a	Iran			31
KT749806	K1a1b2a1a1	Italy			30
KT749809	K1e1	Italy			30
KC158584	K1b1a1c1	Scotland			30
